# Supplementary material for: Aromatic thioglycoside inhibitors against the virulence factor LecA from Pseudomonas aeruginosa
Source: Royal Society of Chemistry journal article supplement (doi:10.1039/c3ob41422a), 2013-01-01

## Supporting information:

### Aromatic Thioglycoside Inhibitors Against the Virulence Factor LecA from *Pseudomonas aeruginosa*

Jacques Rodrigue,<sup>†</sup> Géraldine Ganne,<sup>§</sup> Bertrand Blanchard,<sup>§</sup> Catherine Saucier,<sup>†</sup> Denis Giguère,<sup>†</sup> Tze Chieh Shiao,<sup>†</sup> Annabelle Varrot,<sup>§</sup> Anne Imberty,<sup>\*,§</sup> and René Roy<sup>\*,†</sup>

<sup>†</sup> PharmaQAM - Department of Chemistry, Université du Québec à Montréal, P.O. Box 8888, Succ. Centre-ville, Montréal, Québec, Canada H3C 3P8.

<sup>§</sup>Centre de Recherche sur les Macromolécules Végétales (CERMAV-CNRS affiliated with Université de Grenoble et ICMG),, BP 53, 38041, Grenoble cedex 09, France.

## Table of content

|                                                                               |        |
|-------------------------------------------------------------------------------|--------|
| X-Ray data of compound <b>11</b> .....                                        | S2     |
| HPLC-MS data for compound <b>11</b> .....                                     | S3-S5  |
| <sup>1</sup> H-, <sup>13</sup> C-, and <sup>19</sup> F-NMR for compounds..... | S6-S39 |

**Table . Data collection and refinement statistics. Numbers between parentheses refer to the outer shell.**

|                                                                | LecA-11                                |
|----------------------------------------------------------------|----------------------------------------|
| Beamline<br>(wavelength, Å)                                    | BM14/0.976                             |
| Spacegroup                                                     | P3 <sub>2</sub> 21                     |
| Cell dimensions <i>a, b, c</i><br>(Å)<br><i>α, β, γ</i> (deg.) | 54.33 54.33 3<br>90.50 90.0 90.0 120.0 |
| Resolution (Å)                                                 | 40.00-2.15 (2.27-2.15)                 |
| Measured/ Unique<br>reflections                                | 132611/37963                           |
| Average multiplicity                                           | 3.5 (3.5)                              |
| R <sub>merge</sub>                                             | 0.045 (0.386)                          |
| Completeness (%)                                               | 99.5 (99.9)                            |
| Mean I / <i>σ</i> I                                            | 14.4 (2.3)                             |
| Wilson B                                                       | 40.0                                   |
| <i>R</i> <sub>cryst</sub> / <i>R</i> <sub>free</sub>           | 21.4/25.9                              |
| R <sub>msd</sub> bonds, Å                                      | 0.014                                  |
| R <sub>msd</sub> angles, °                                     | 1.66                                   |
| Rmsd chiral, Å <sup>3</sup>                                    | 0.102                                  |
| Protein atoms /per<br>chain<br>Bfac Å <sup>2</sup>             | 907/901/901/901<br>40.4/44.4/50.2/44.3 |
| Water molecules<br>Bfac, Å <sup>2</sup>                        | 235<br>43.7                            |
| Ligand atoms<br>Bfac, Å <sup>2</sup>                           | 22/22/22/22<br>42.4/55.7/63.5/48.3     |
| Calcium atoms<br>Bfac, Å <sup>2</sup>                          | 1/1/1/1<br>39.0/51.0/64.6/47.5         |
| PDB code                                                       | 4A6S                                   |

130130 – Cpd 11-(DG144) Percent purity by LC (UV 254)

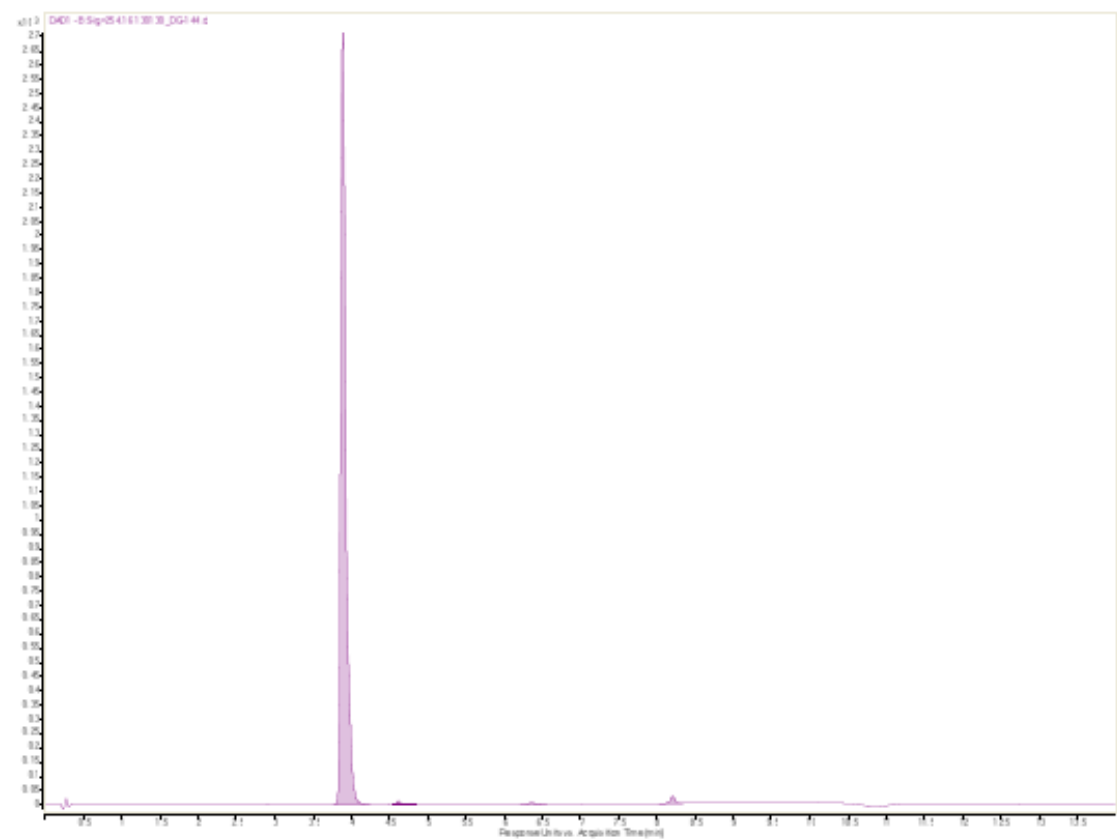

| Peak | RT   | Area     | Area% | Height  | Width | purity |
|------|------|----------|-------|---------|-------|--------|
| 1    | 3,89 | 13006,15 | 100   | 2715,27 | 0,48  | 98,77% |
| 2    | 4,62 | 48,03    | 0,37  | 12,53   | 0,29  | 0,37%  |
| 3    | 6,37 | 22,83    | 0,18  | 5,78    | 0,35  | 0,18%  |
| 4    | 8,21 | 91,2     | 0,7   | 23,67   | 0,31  | 0,69%  |

101,25

## Qualitative Compound Report

|                        |                                    |                               |                |
|------------------------|------------------------------------|-------------------------------|----------------|
| <b>Data File</b>       | Roy_Chichi_DG-144_20130129.d       | <b>Sample Name</b>            | Cpd 11: DG-144 |
| <b>Sample Type</b>     | Sample                             | <b>Position</b>               | P1-A1          |
| <b>Instrument Name</b> | Instrument 1                       | <b>User Name</b>              |                |
| <b>Acq Method</b>      | Vladimir_LC_10-95-6_pos_100a2000.m | <b>IRM Calibration Status</b> | Success        |
| <b>DA Method</b>       | Default.m                          | <b>Comment</b>                |                |

### Compound Table

| Compound Label      | RT    | Mass     | Abund  | Formula      | Tgt Mass | Diff (ppm) |
|---------------------|-------|----------|--------|--------------|----------|------------|
| Cpd 1: C16 H18 O5 S | 4.232 | 322.0871 | 426982 | C16 H18 O5 S | 322.0875 | -1.13      |

| Compound Label      | RT    | Algorithm       | Mass     |
|---------------------|-------|-----------------|----------|
| Cpd 1: C16 H18 O5 S | 4.232 | Find By Formula | 322.0871 |

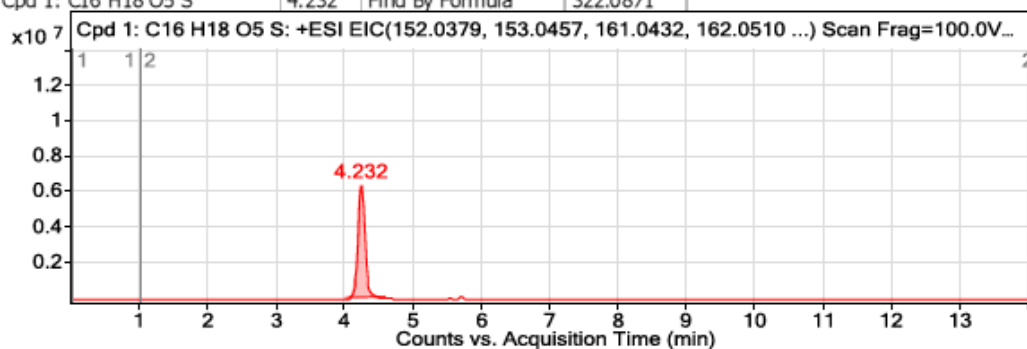

### MS Spectrum

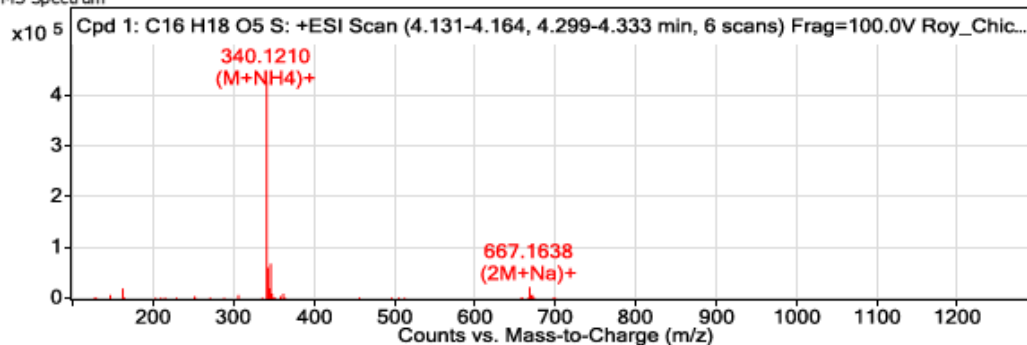

Qualitative Compound Report

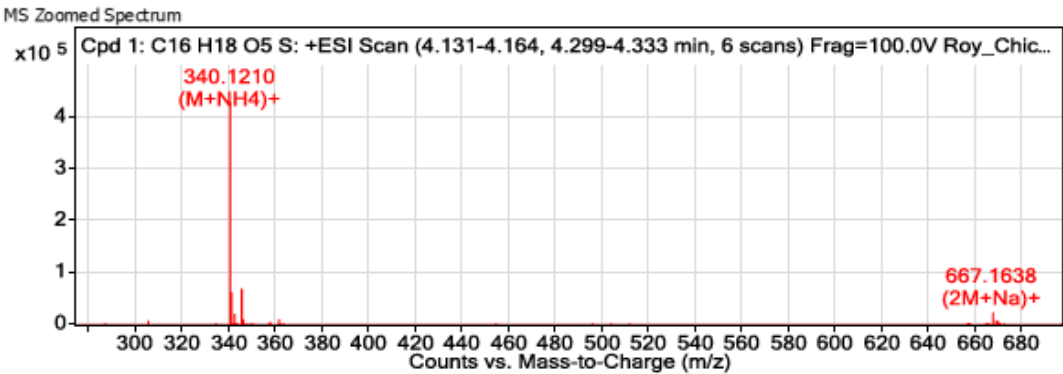

MS Spectrum Peak List

| m/z      | Calc m/z | Diff(ppm) | z | Abund  | Formula           | Ion          |
|----------|----------|-----------|---|--------|-------------------|--------------|
| 305.0836 | 305.0842 | -2.06     | 1 | 7015   | C16 H17 O4 S      | (M+H)+[-H2O] |
| 322.0876 | 322.0869 | 1.98      | 1 | 230    | C16 H18 O5 S      | M*+          |
| 323.0951 | 323.0948 | 0.99      | 1 | 257    | C16 H19 O5 S      | (M+H)+       |
| 340.121  | 340.1213 | -1.07     |   | 426998 | C16 H22 N O5 S    | (M+NH4)+     |
| 340.3517 |          |           |   | 26881  |                   |              |
| 341.124  | 341.1244 | -1.31     |   | 63082  | C16 H22 N O5 S    | (M+NH4)+     |
| 342.1199 | 342.1208 | -2.46     |   | 21069  | C16 H22 N O5 S    | (M+NH4)+     |
| 345.0762 | 345.0767 | -1.45     |   | 75654  | C16 H18 Na O5 S   | (M+Na)+      |
| 361.0502 | 361.0507 | -1.14     | 1 | 9851   | C16 H18 K O5 S    | (M+K)+       |
| 667.1638 | 667.1642 | -0.56     | 1 | 22886  | C32 H36 Na O10 S2 | (2M+Na)+     |

--- End Of Report ---

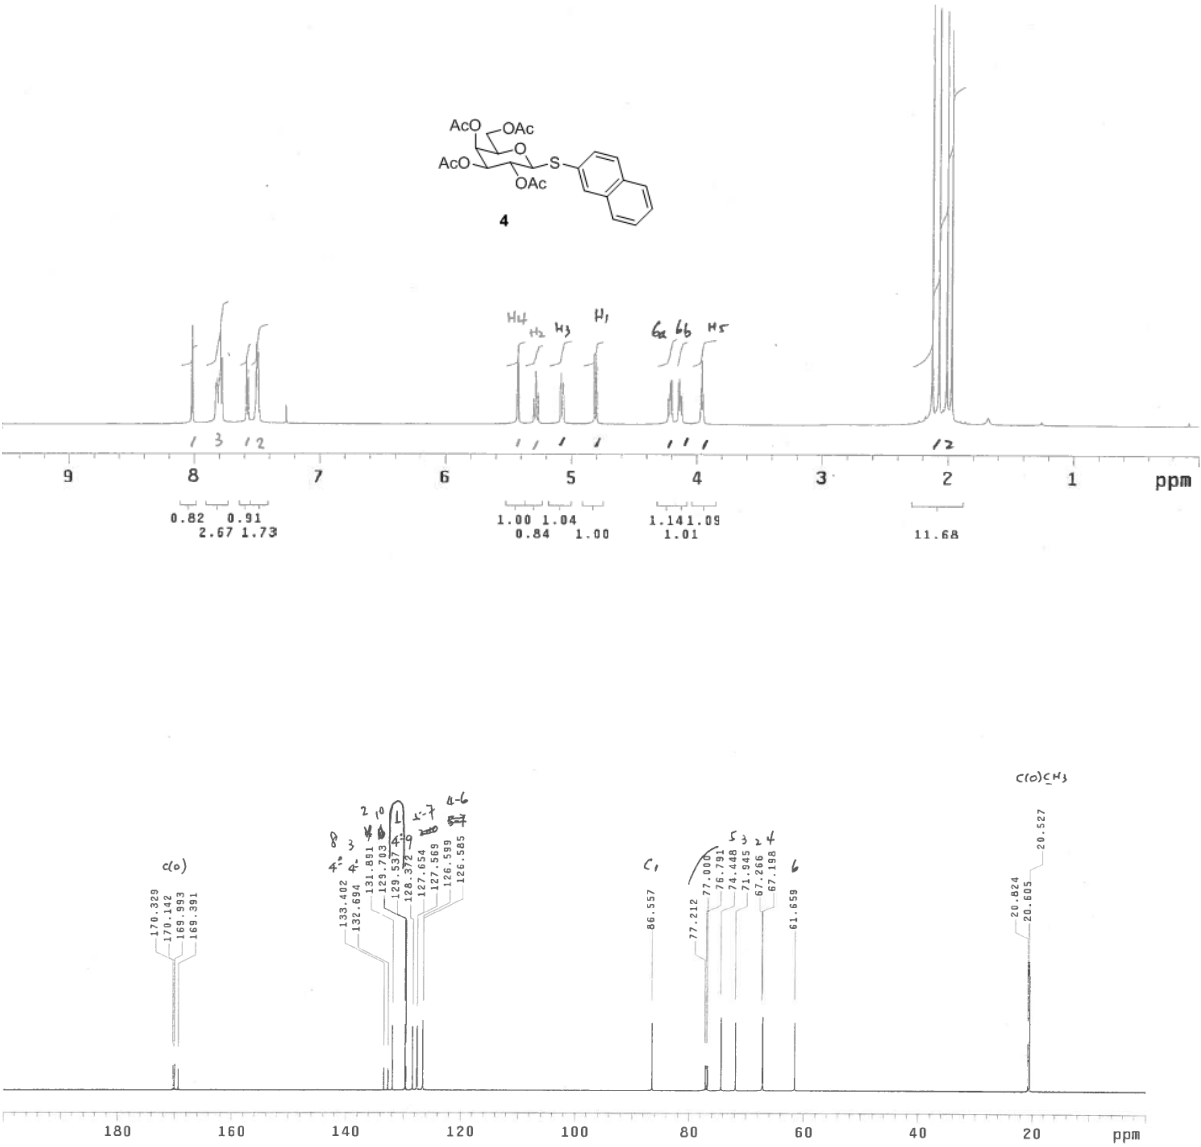

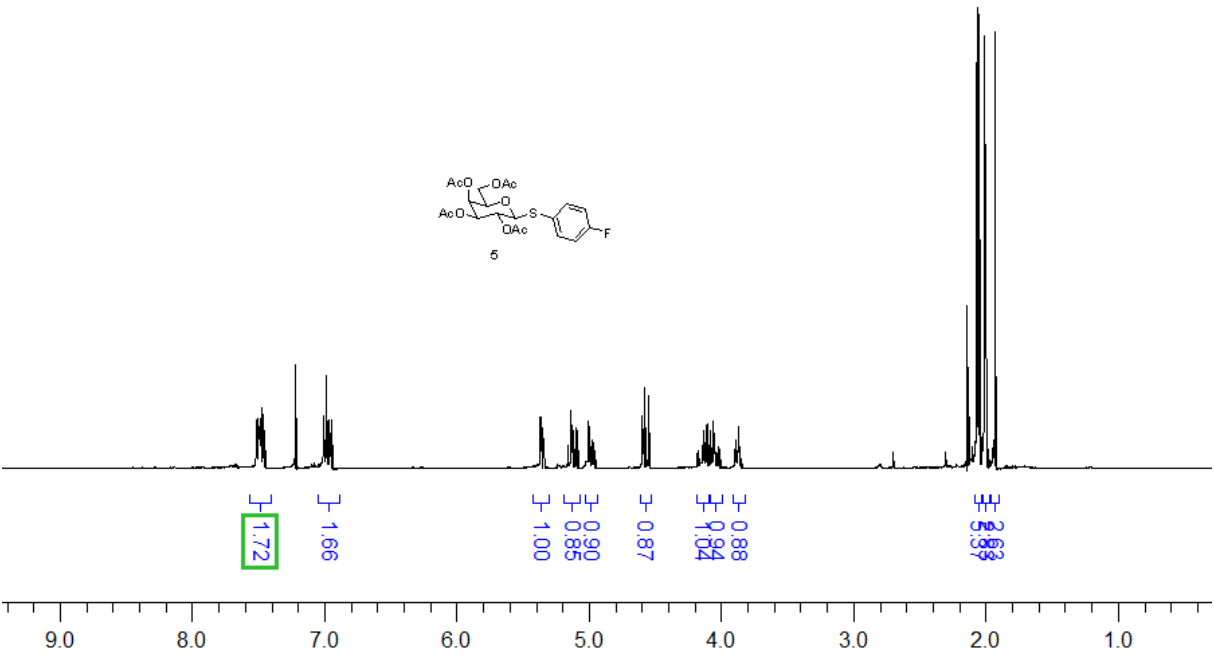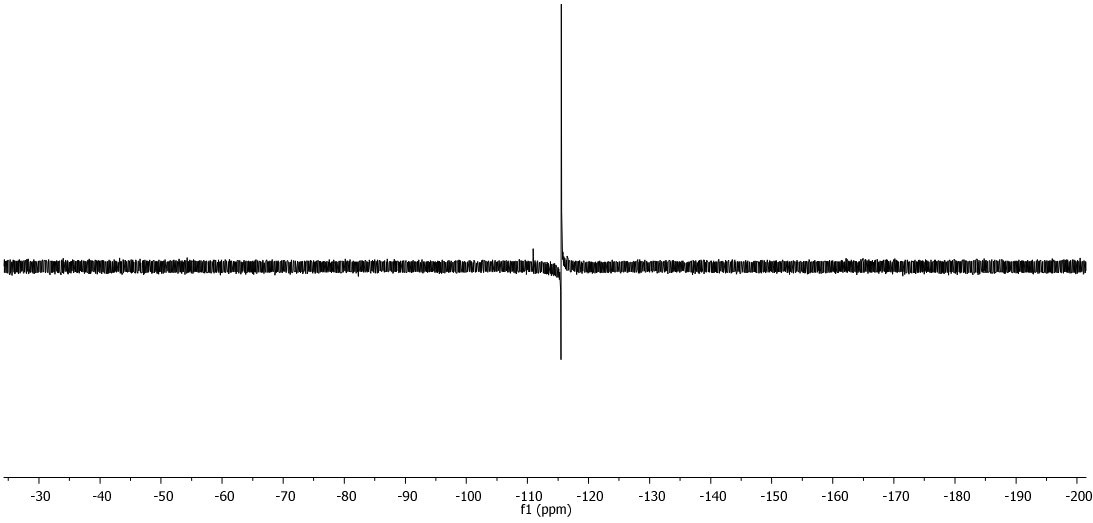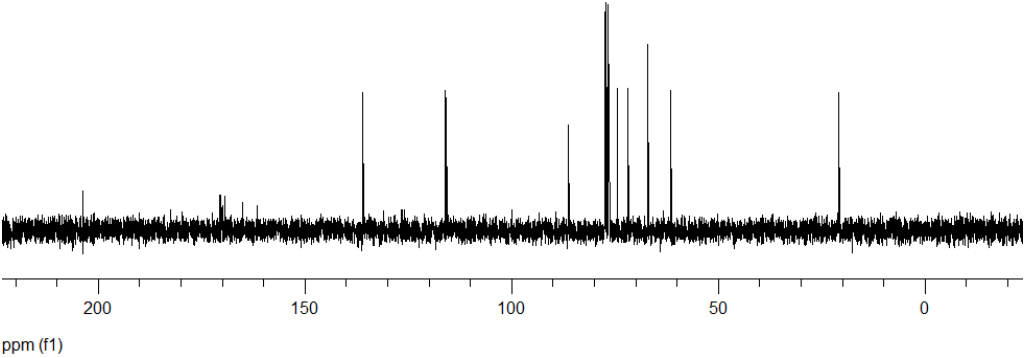

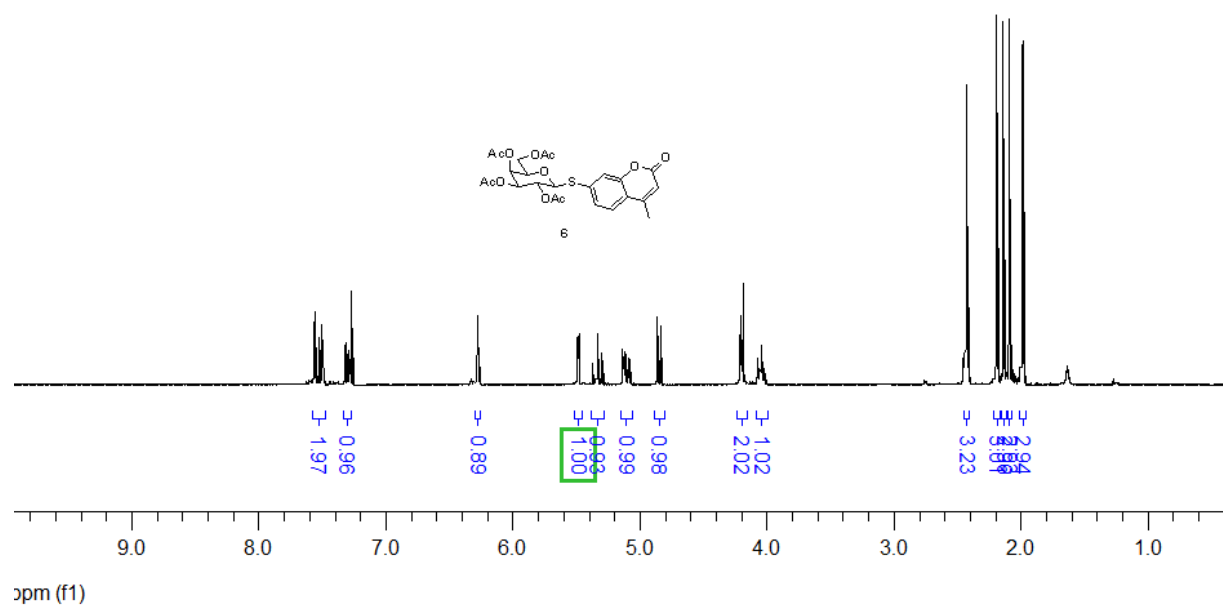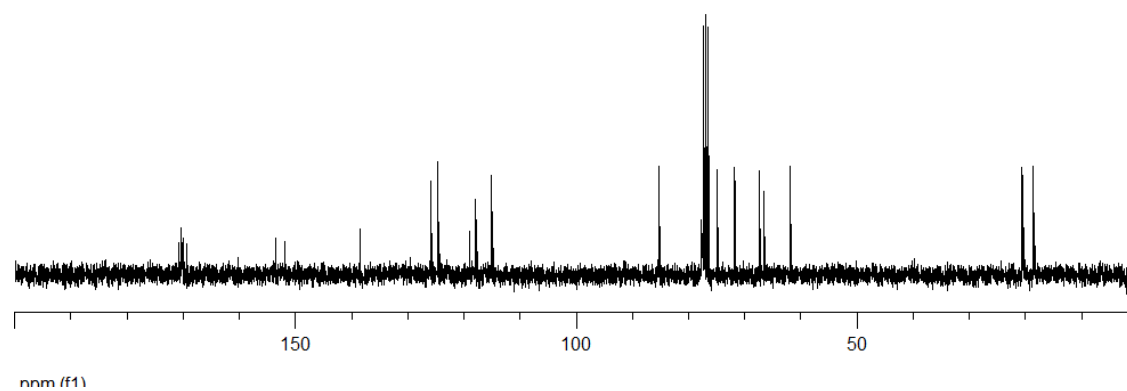



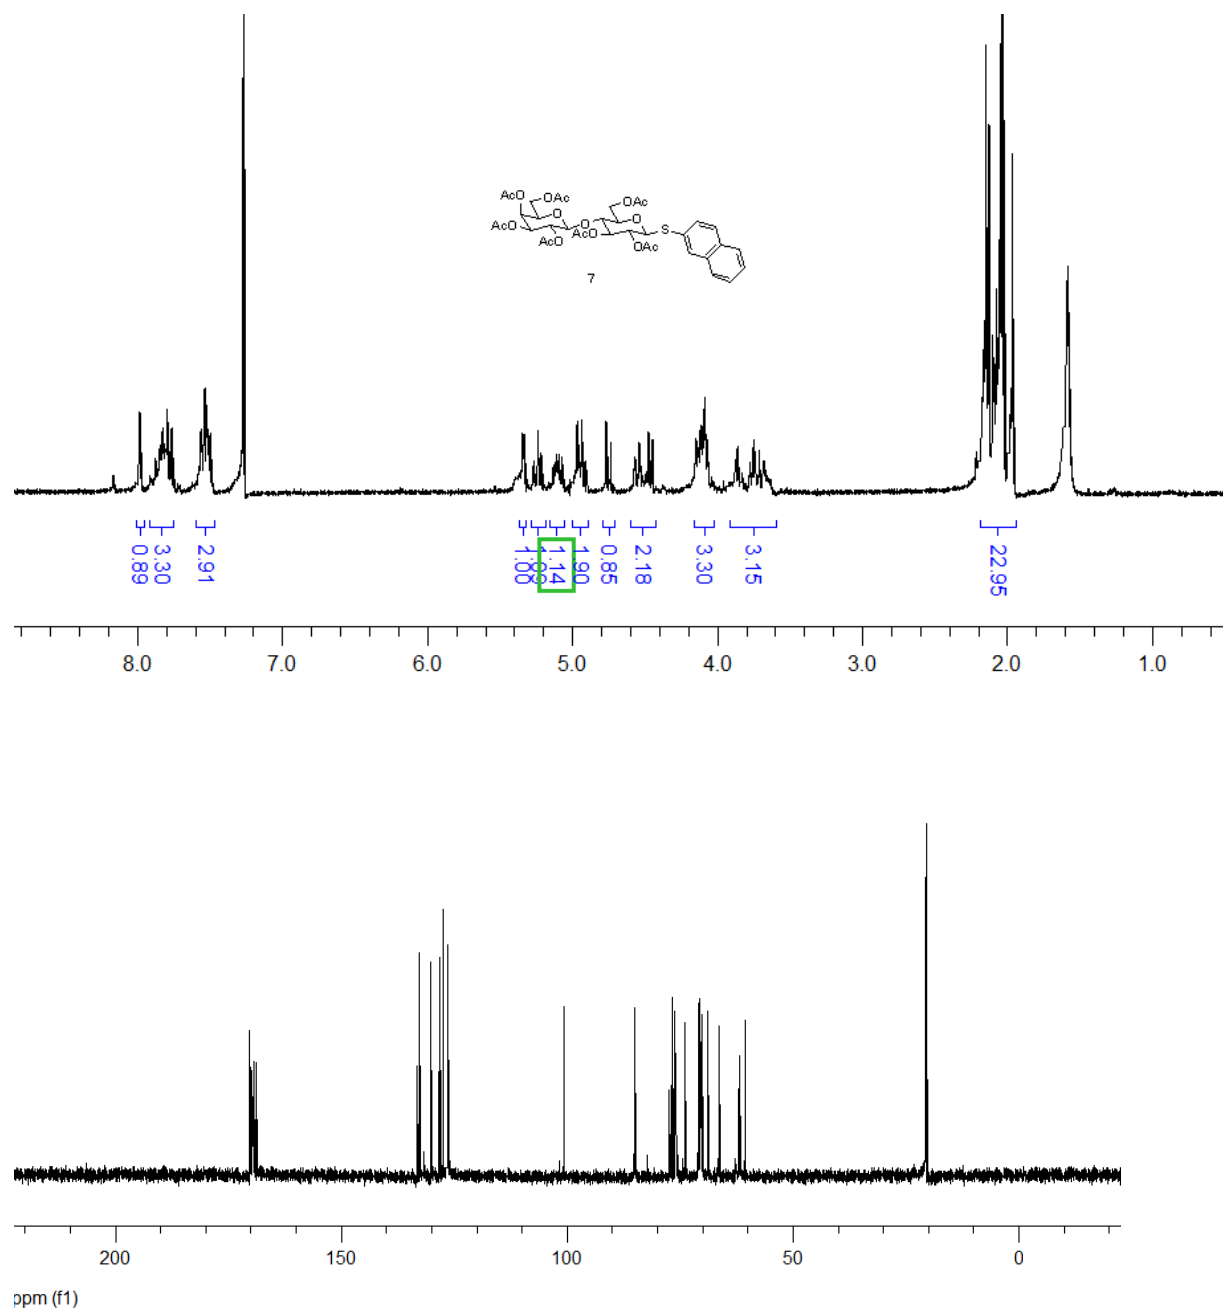

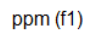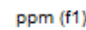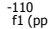

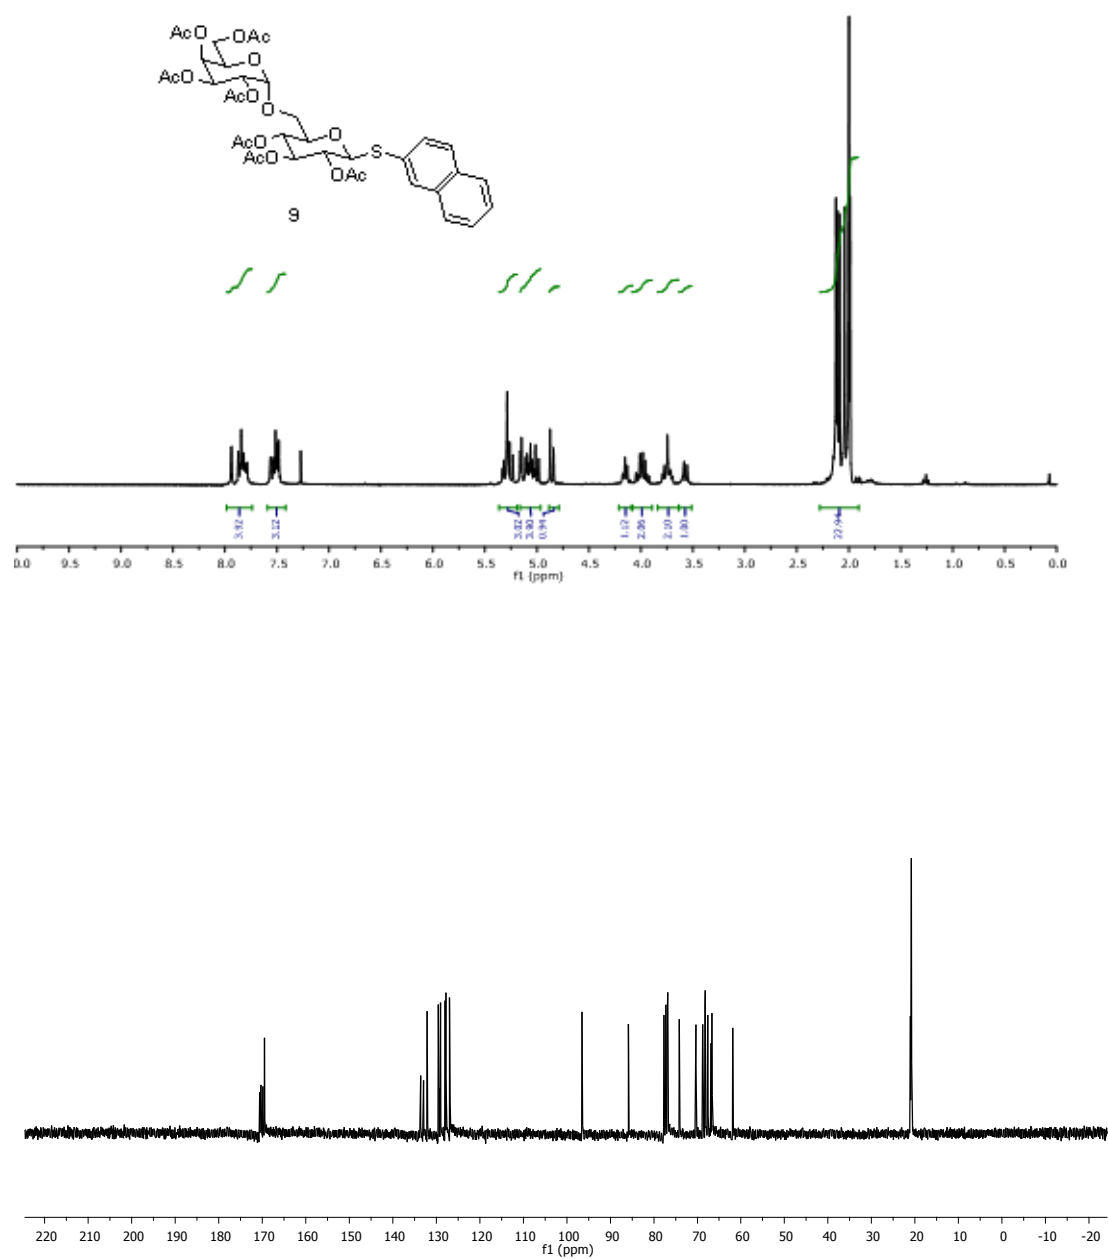

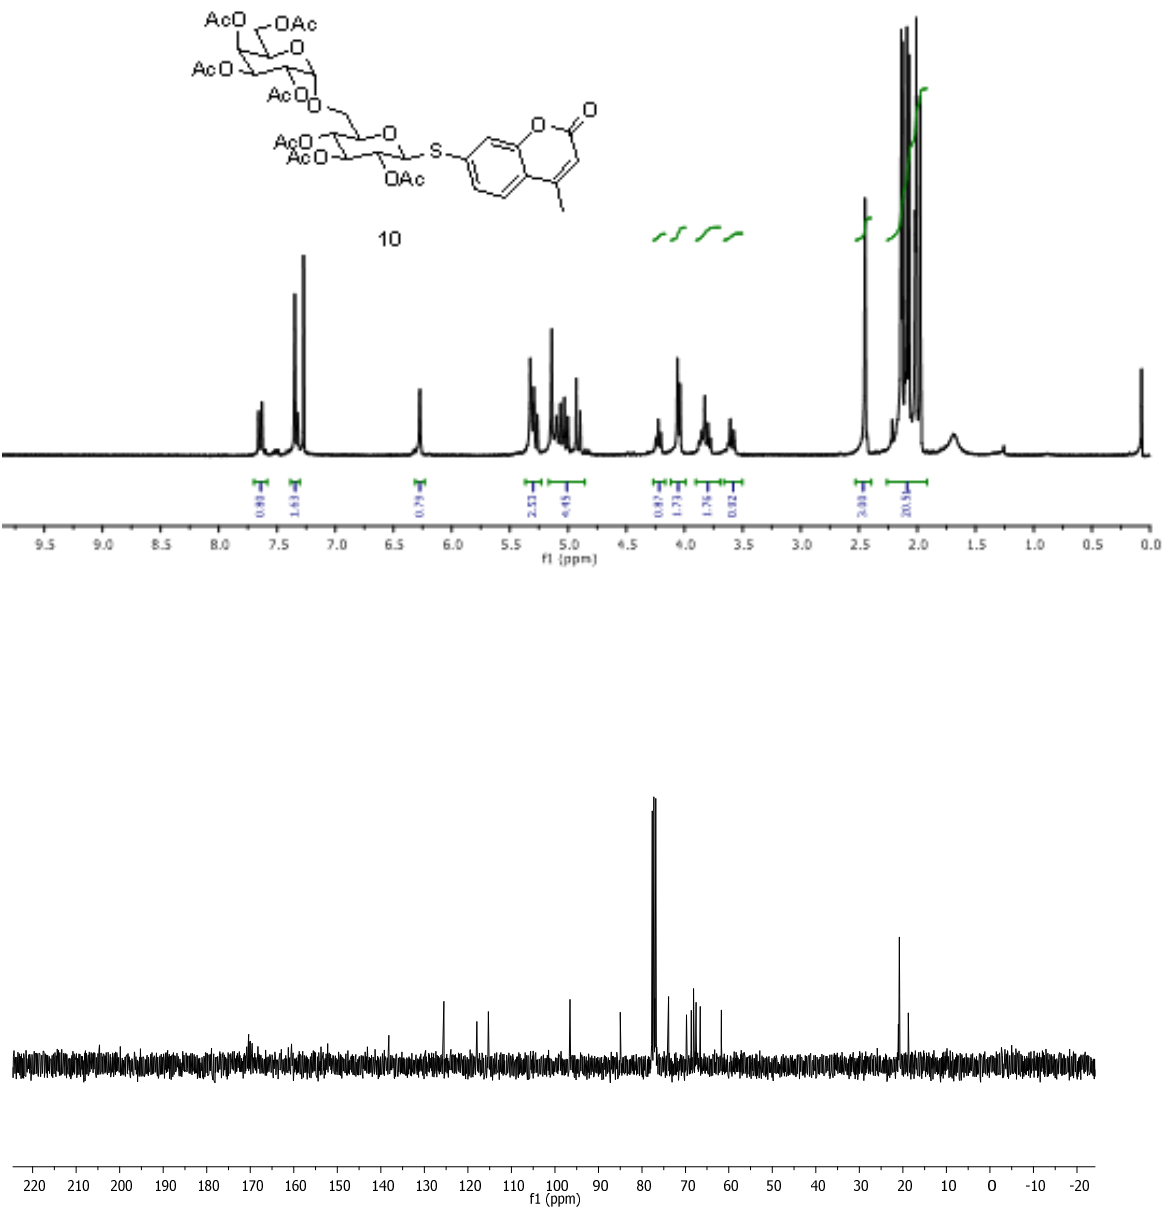

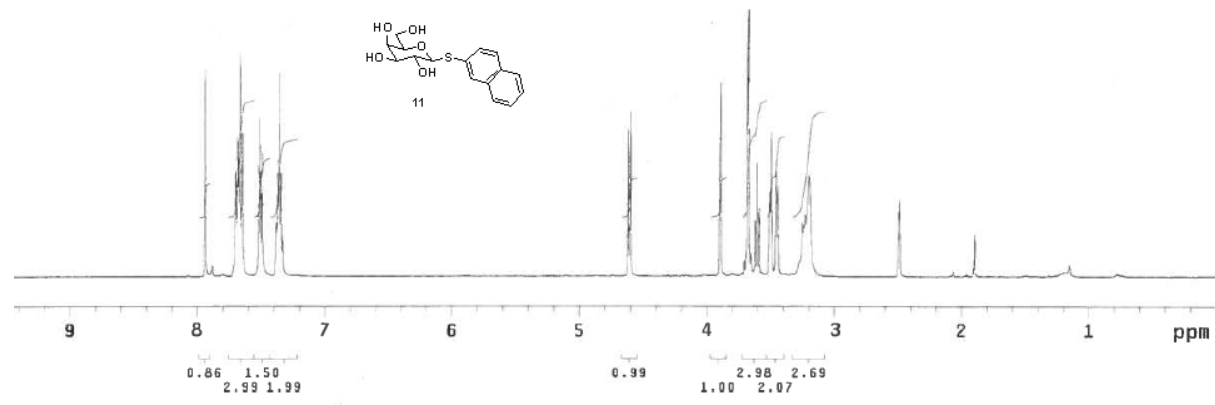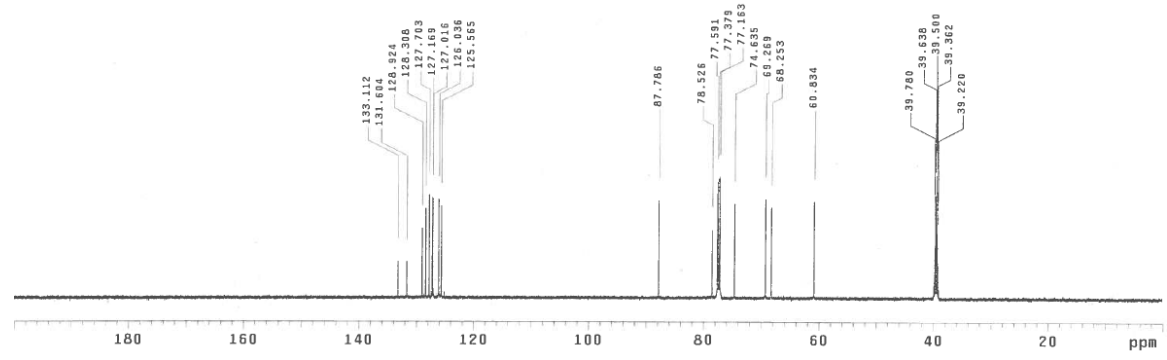

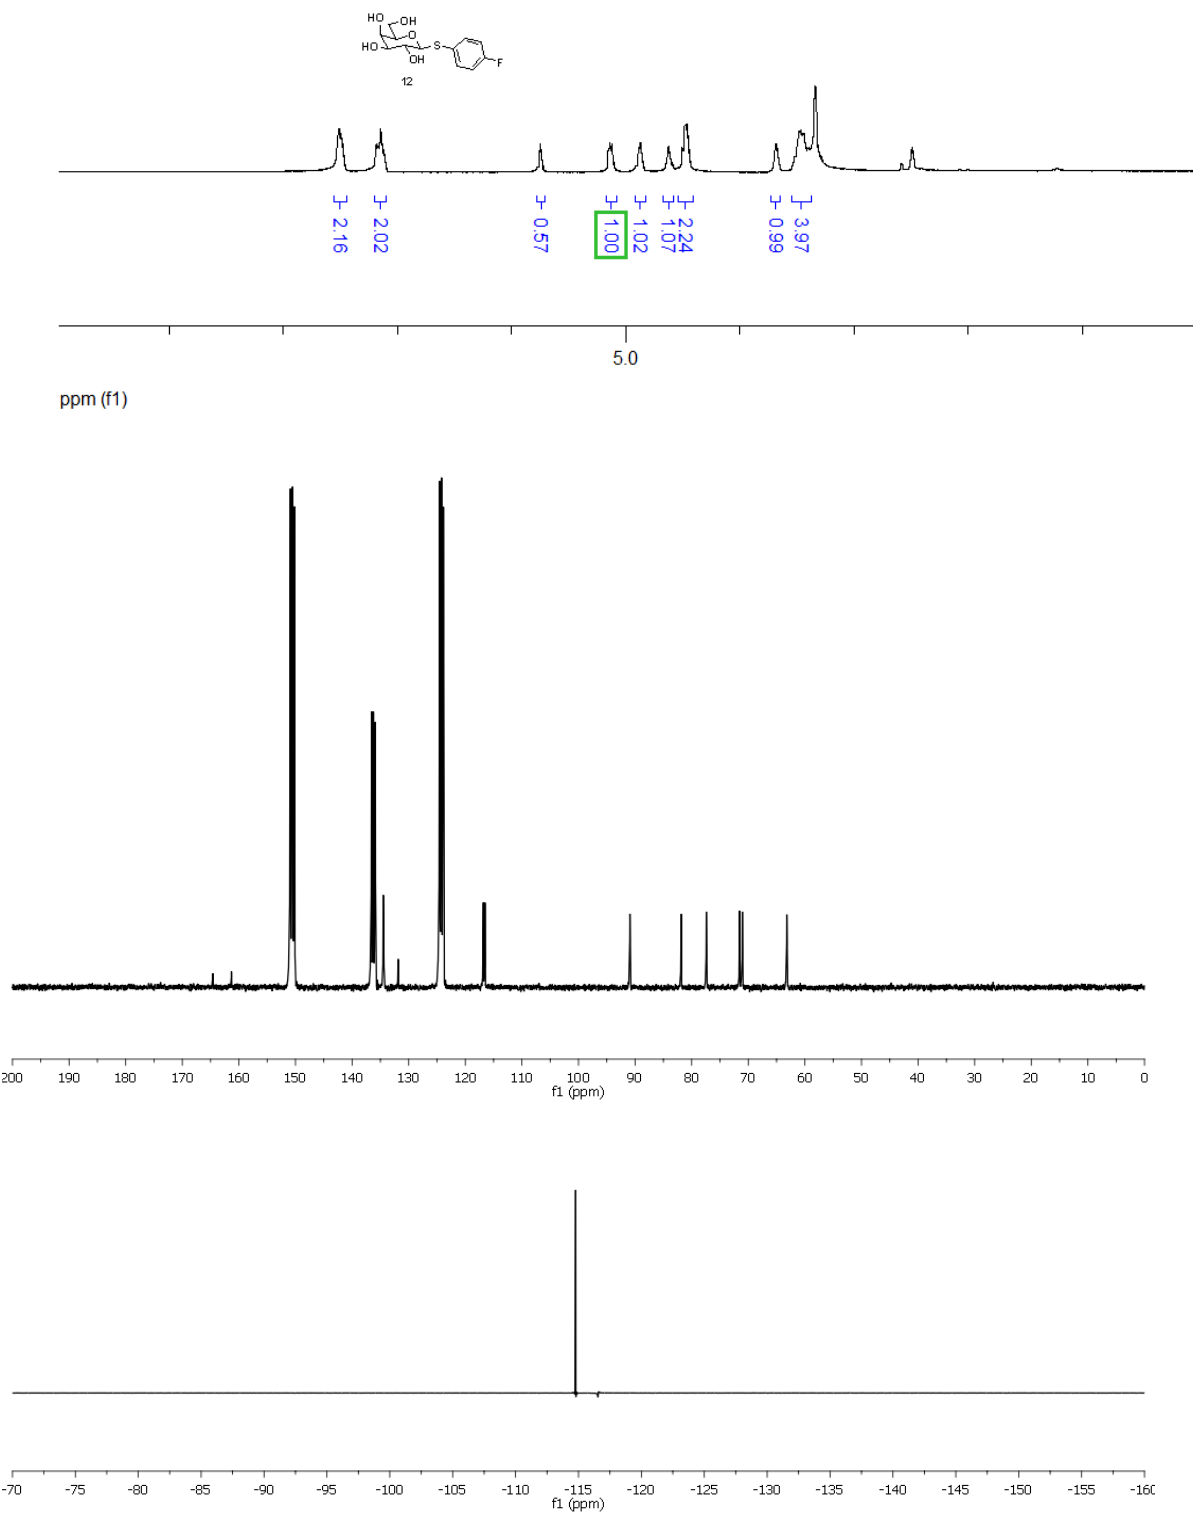

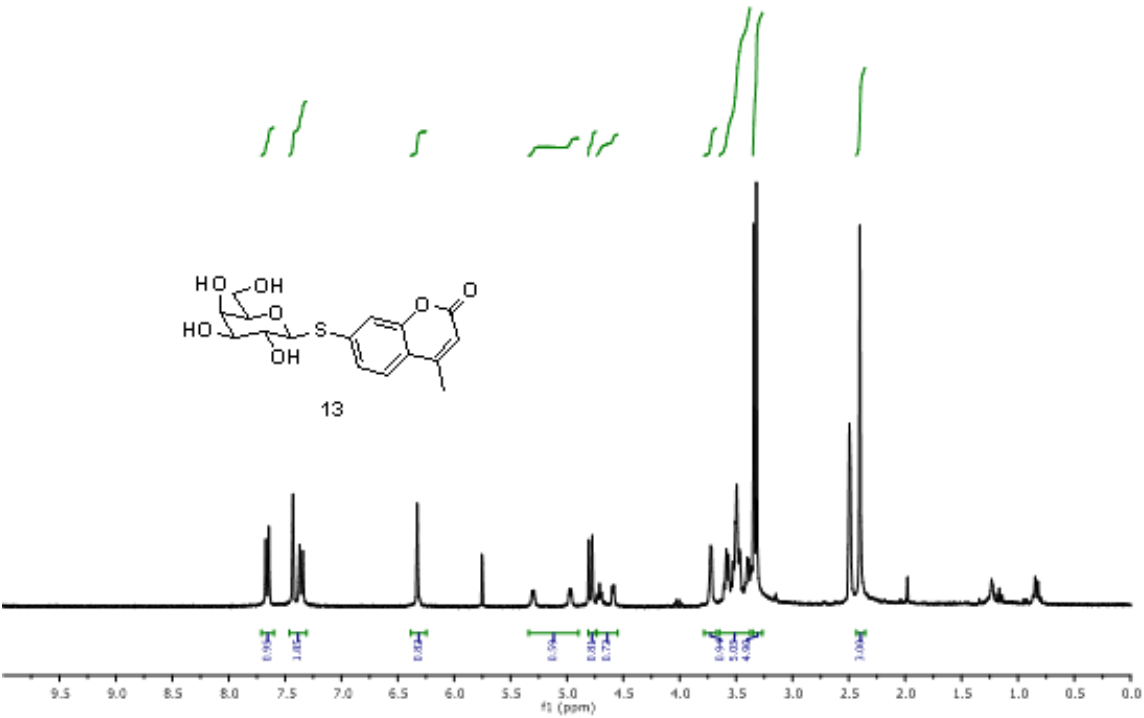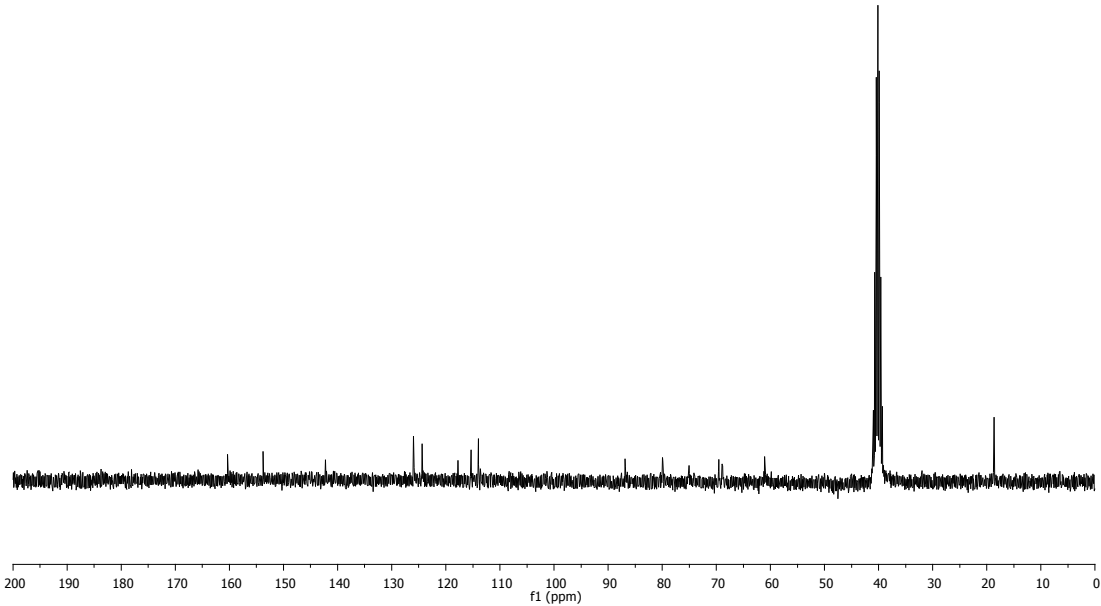

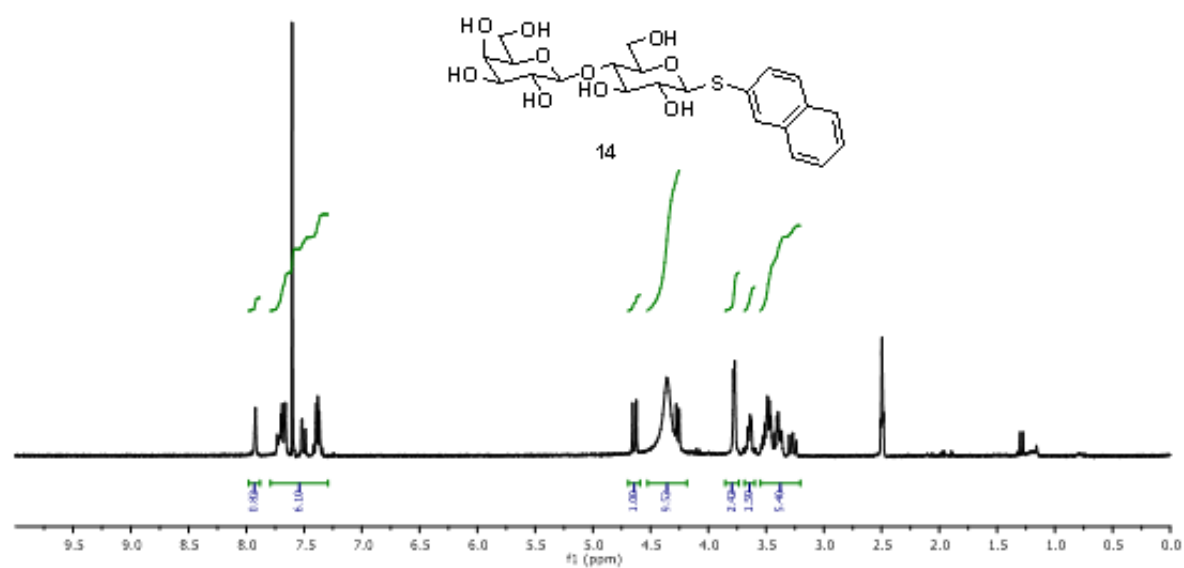



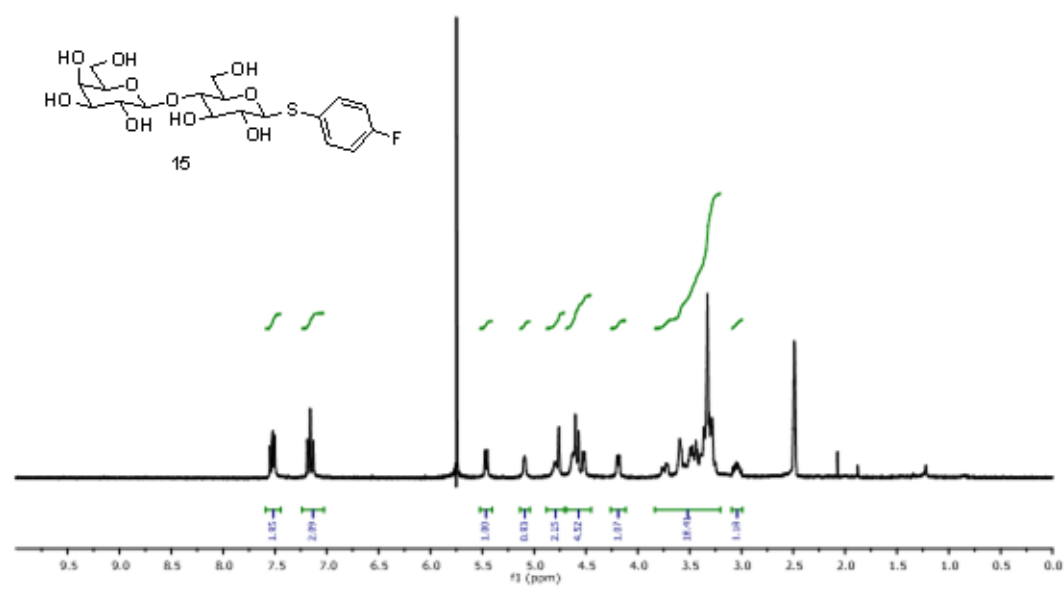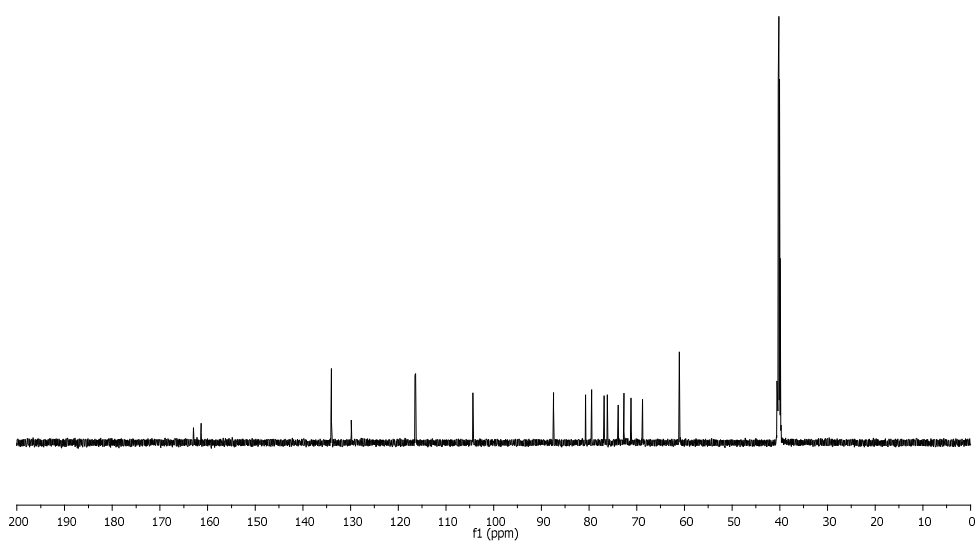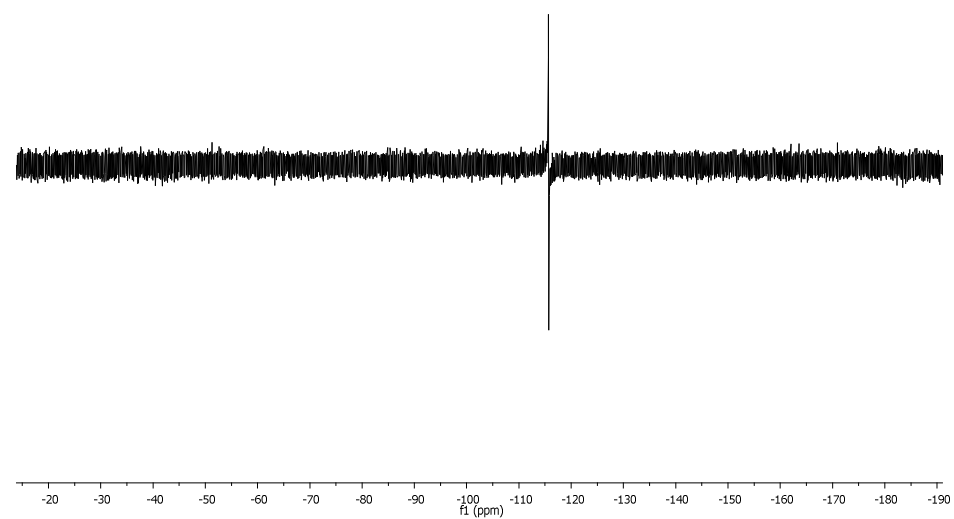

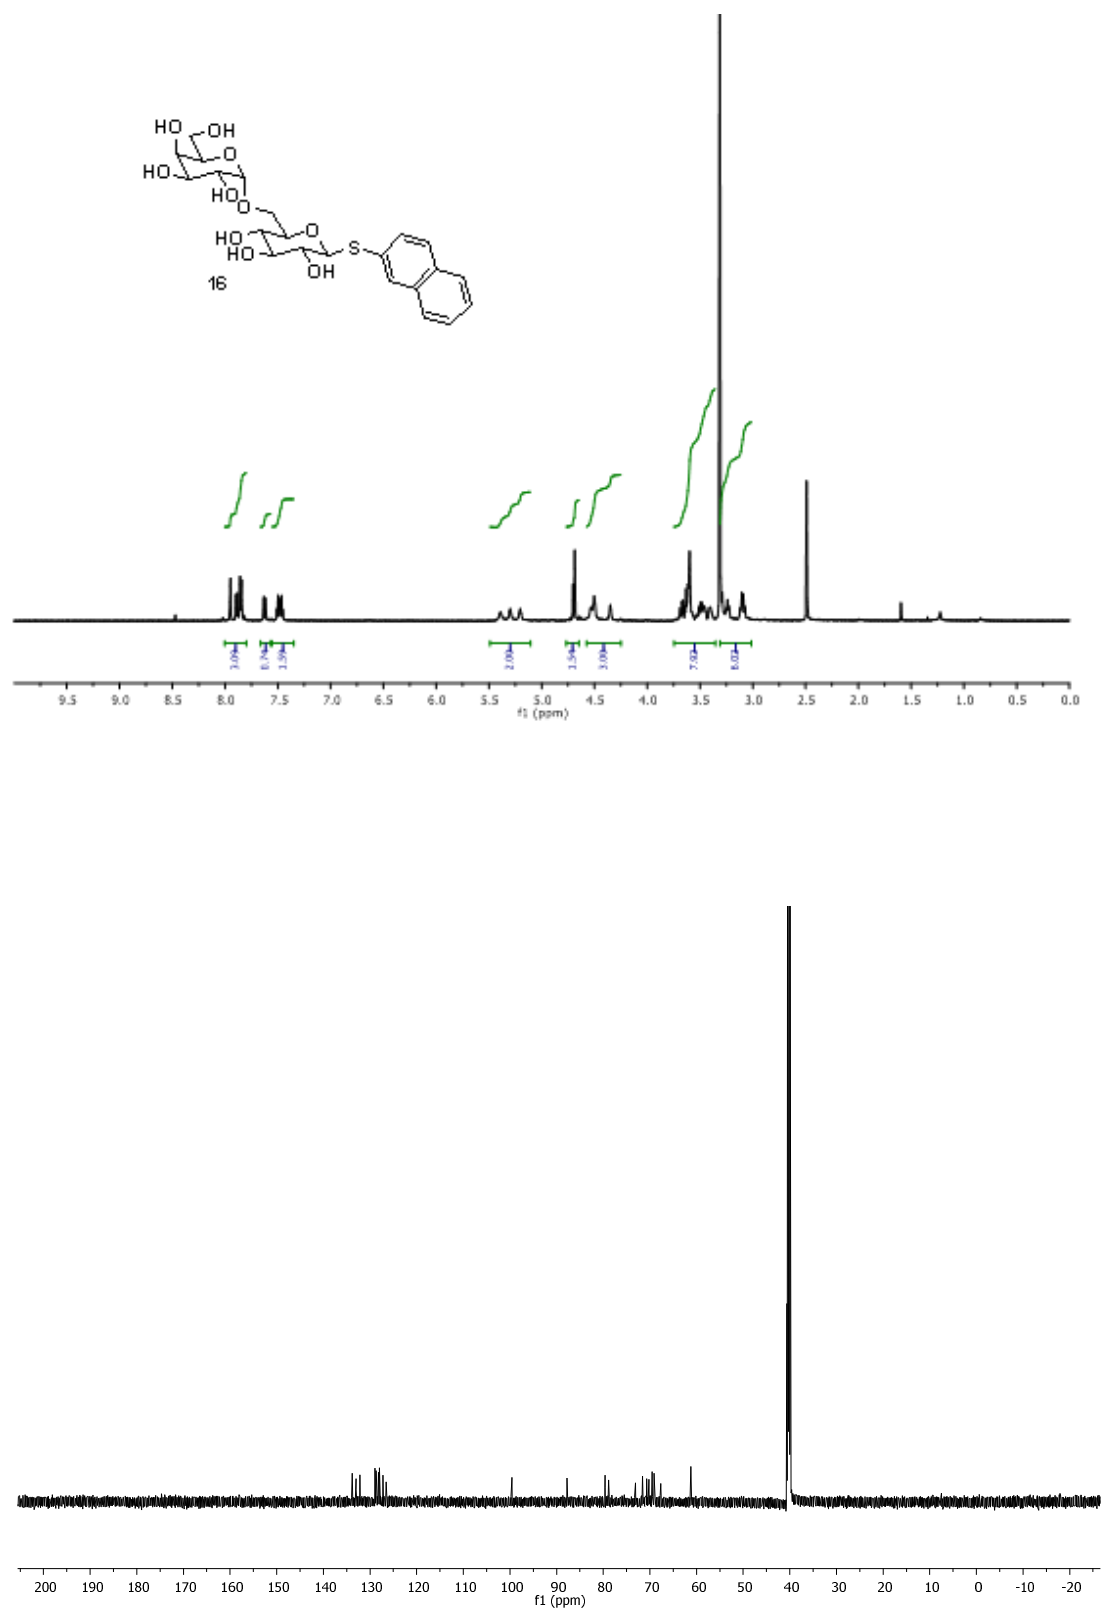

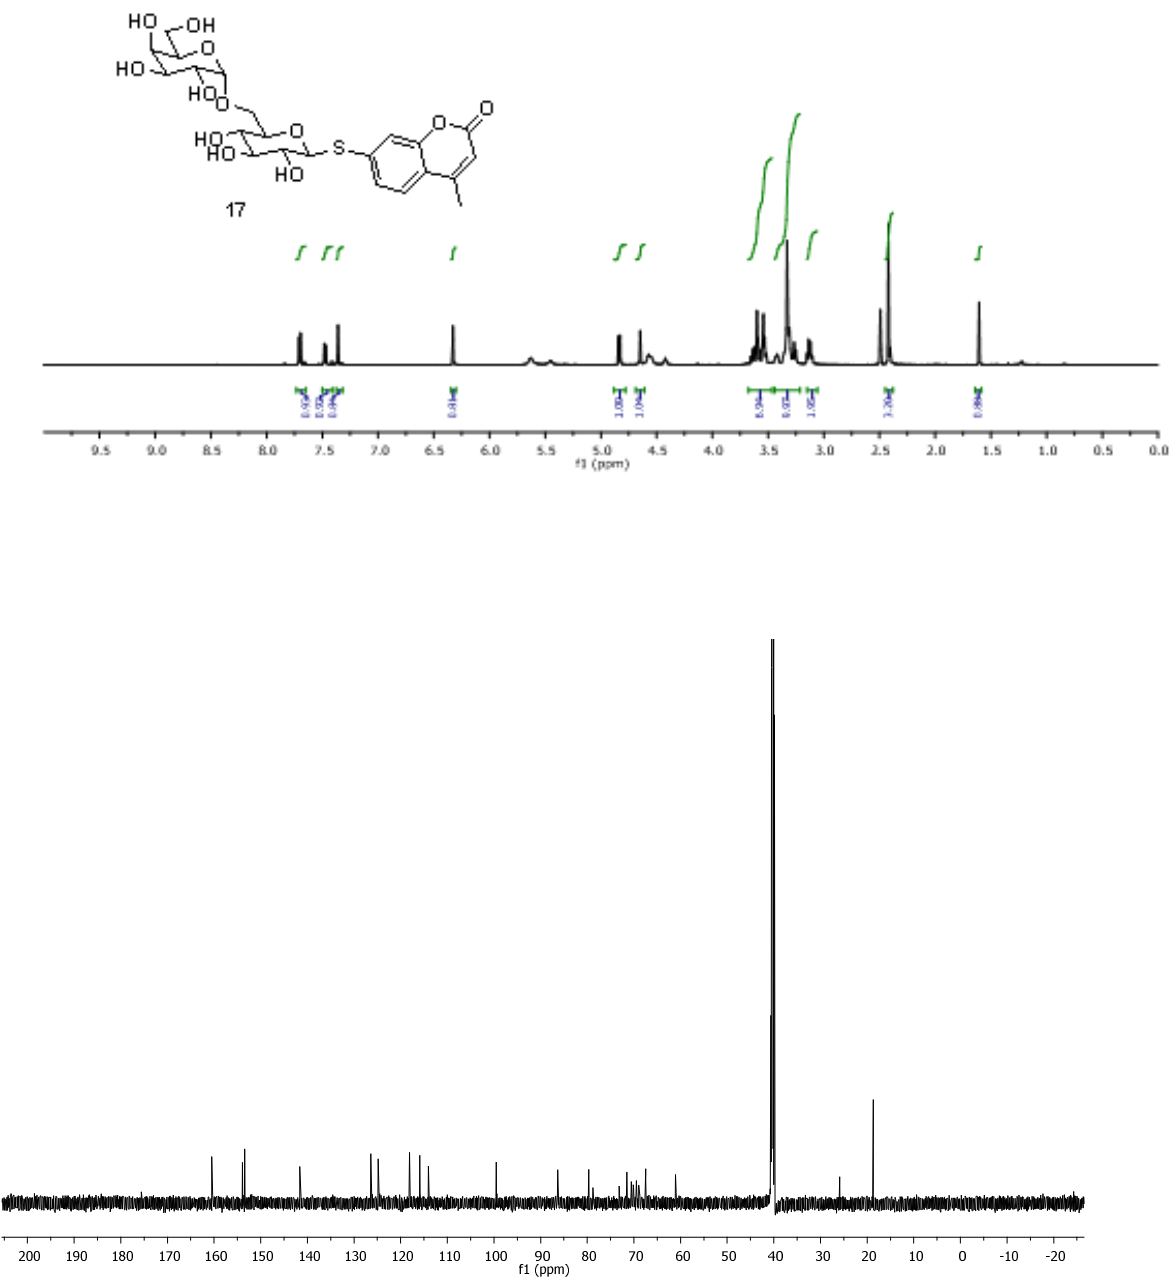

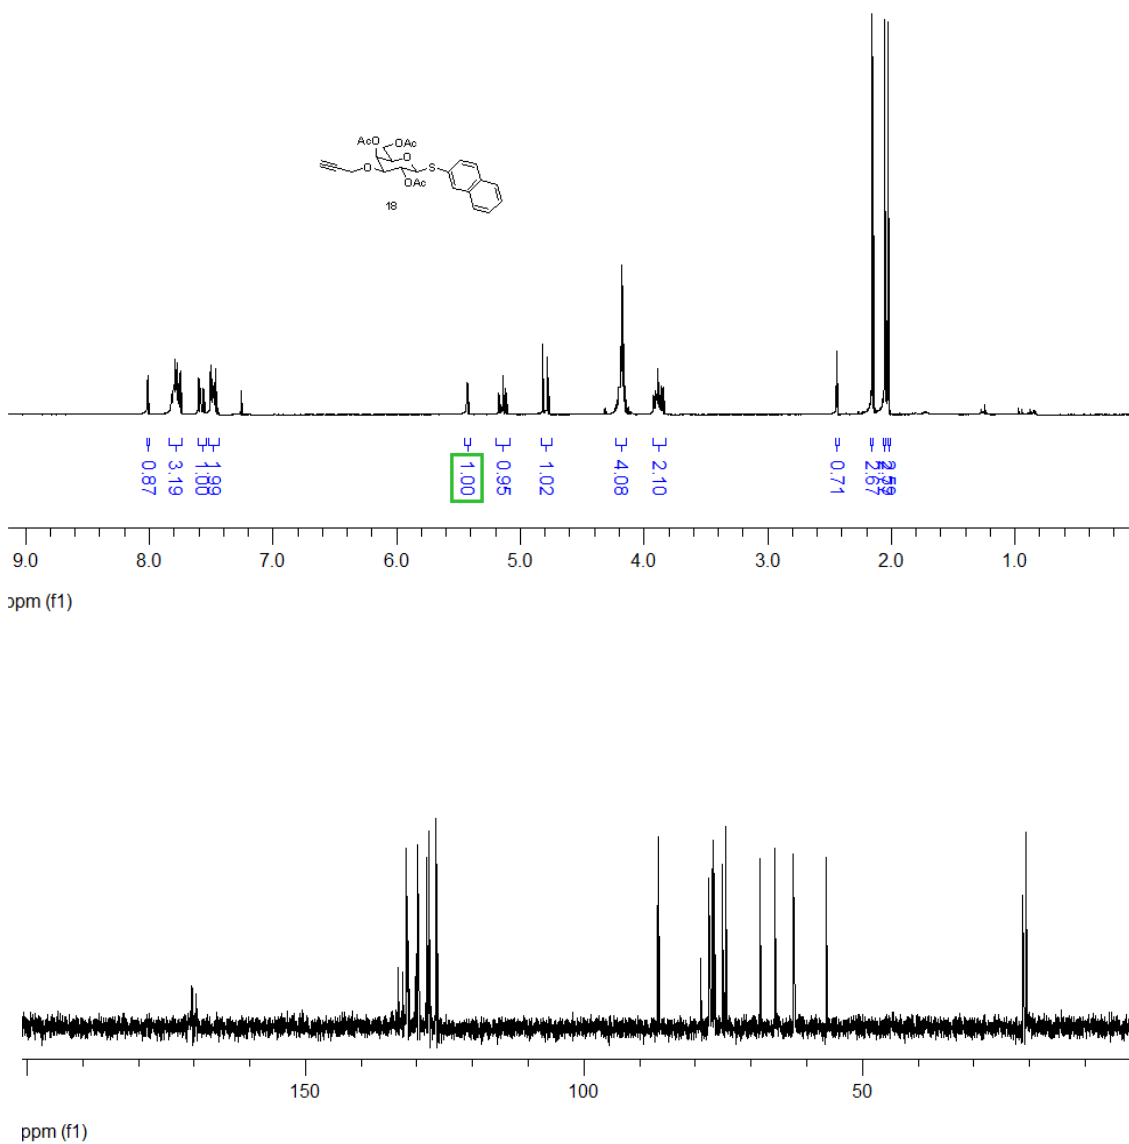

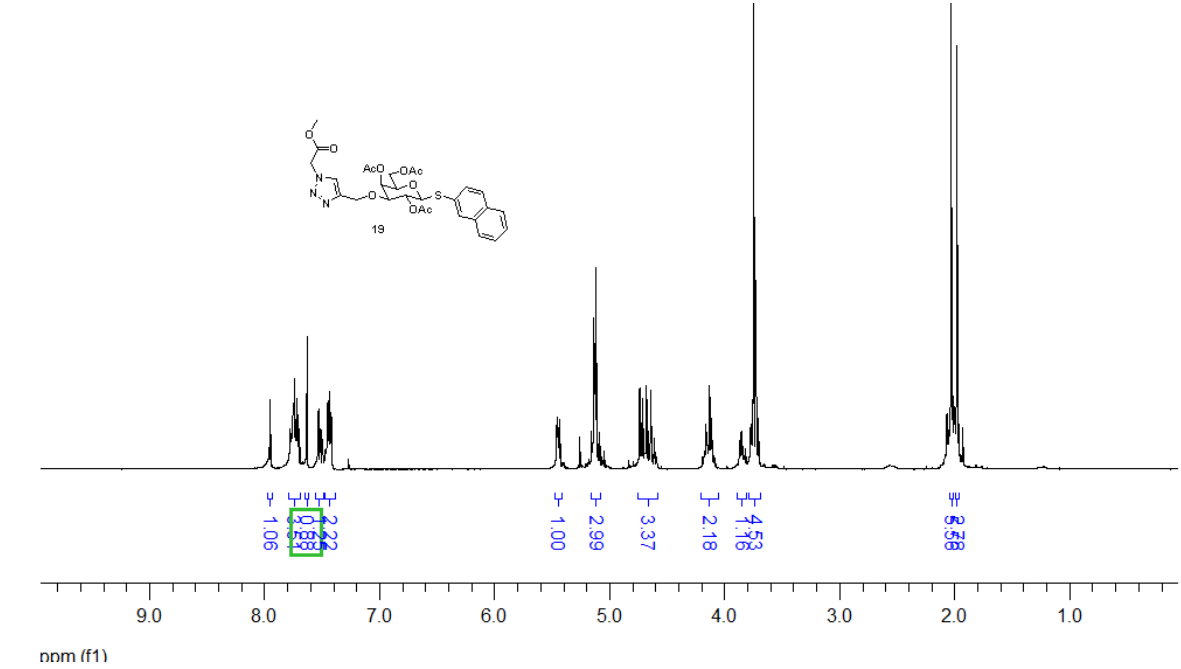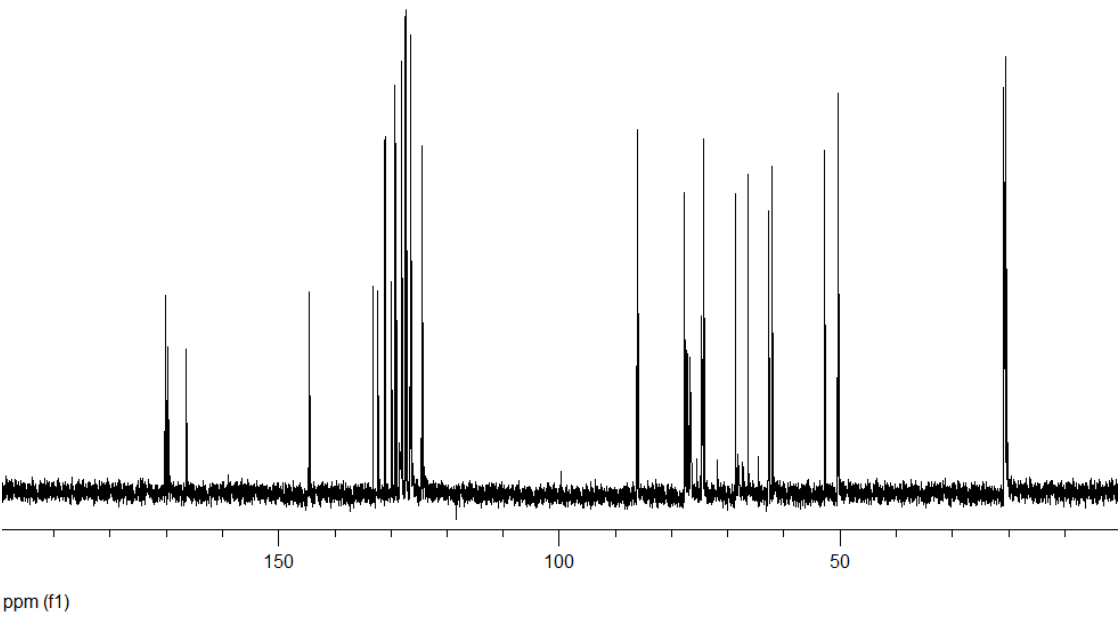

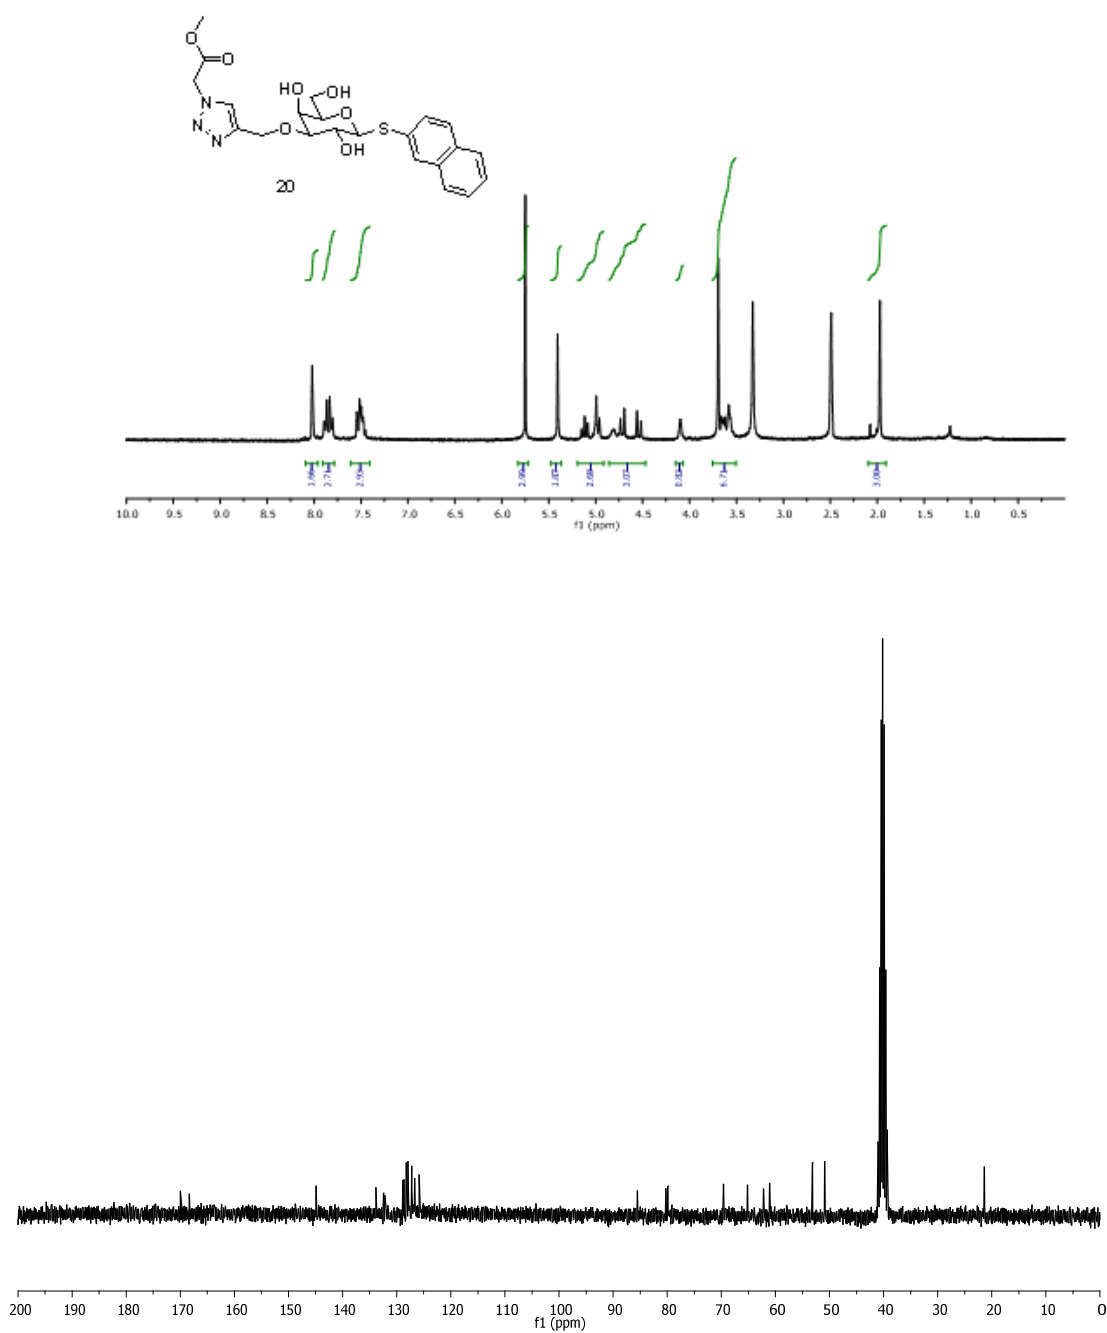

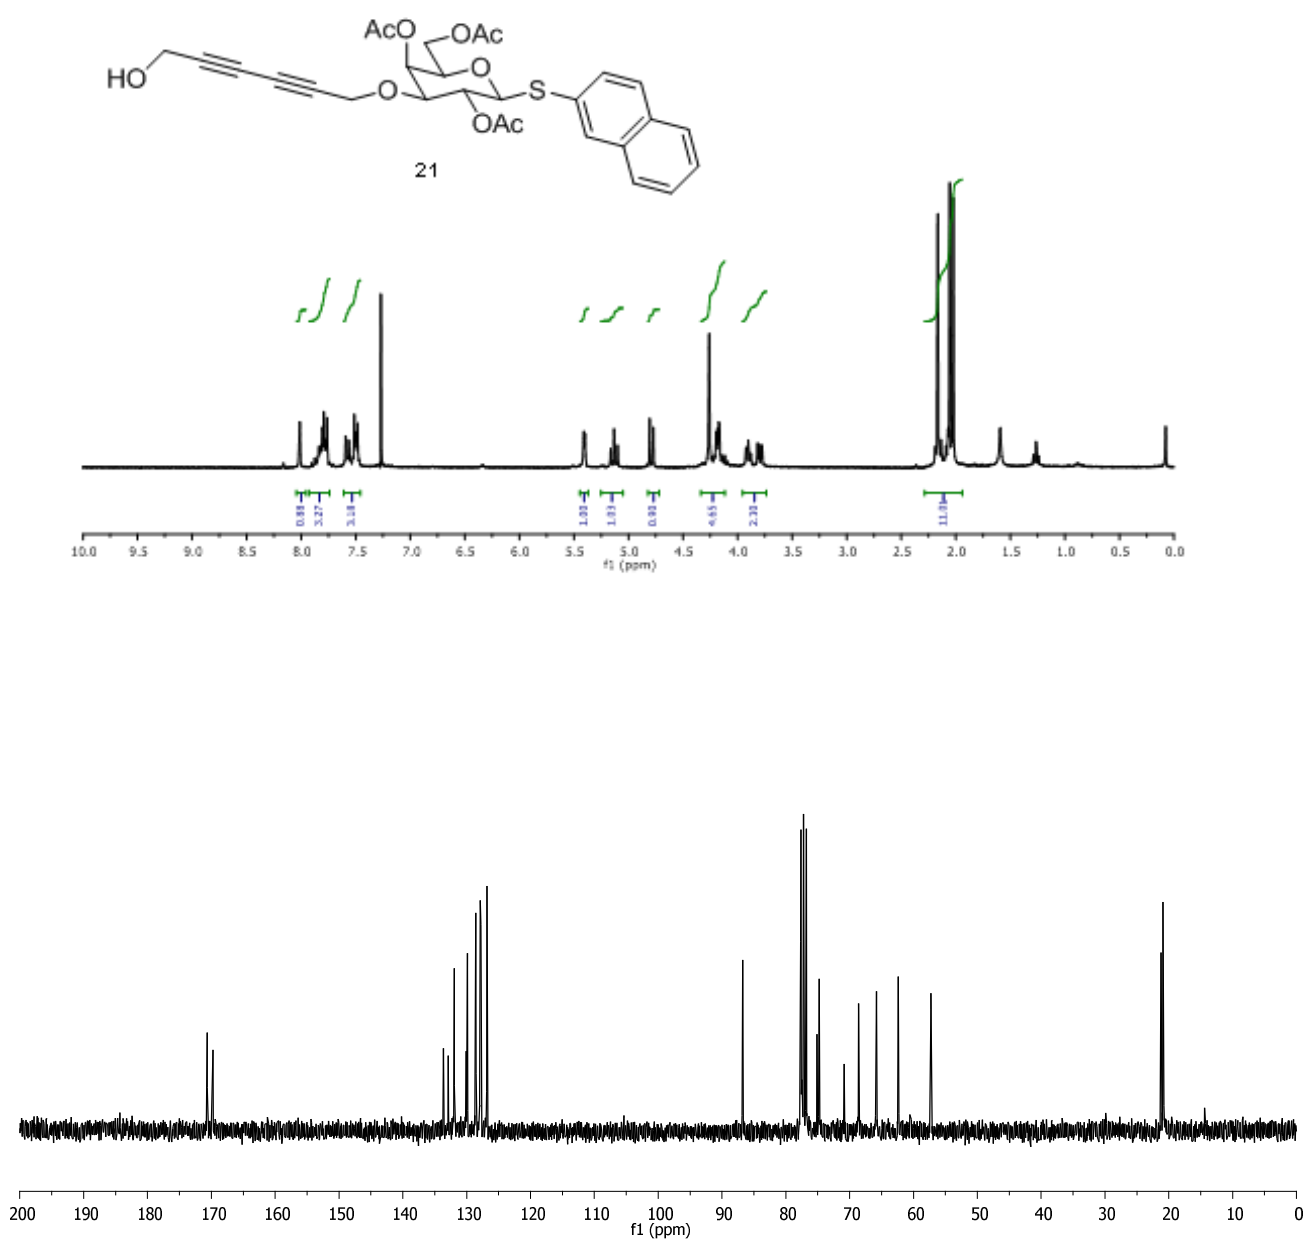

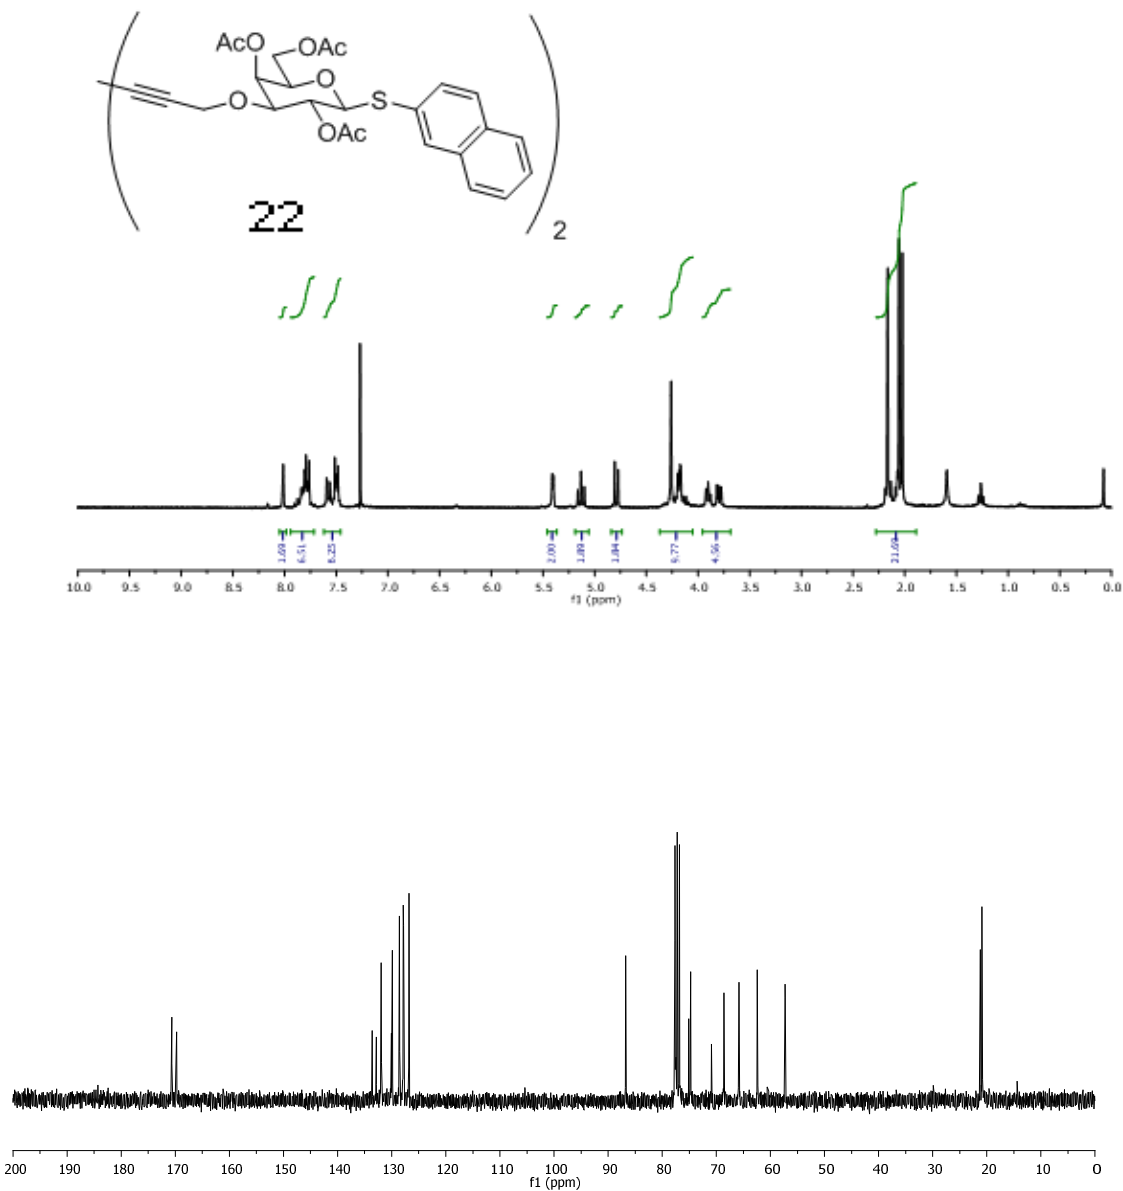



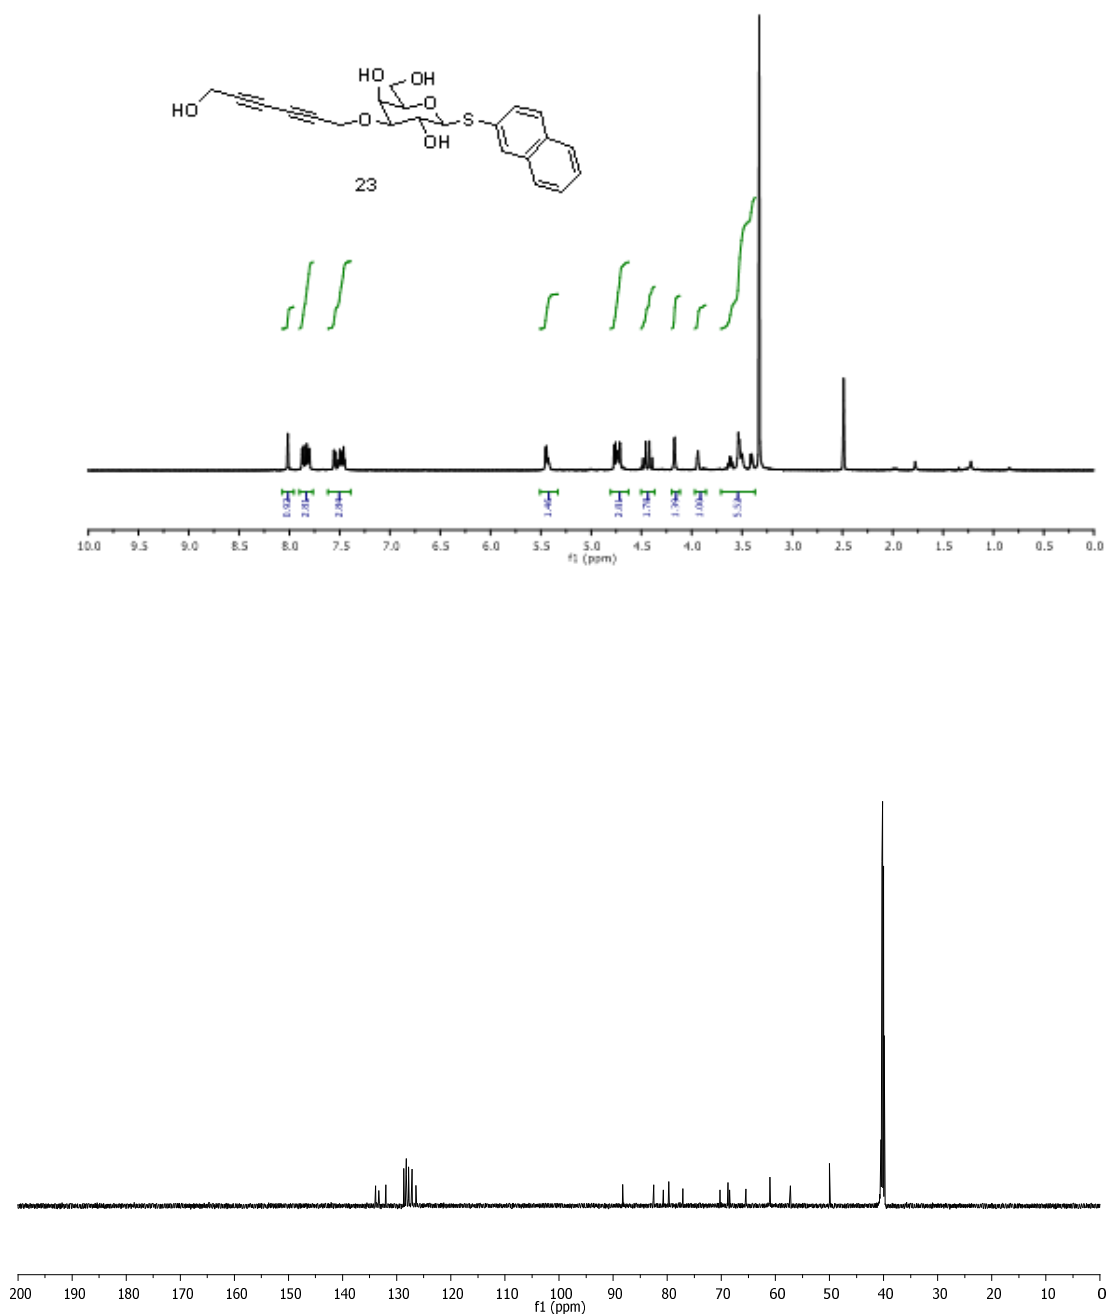

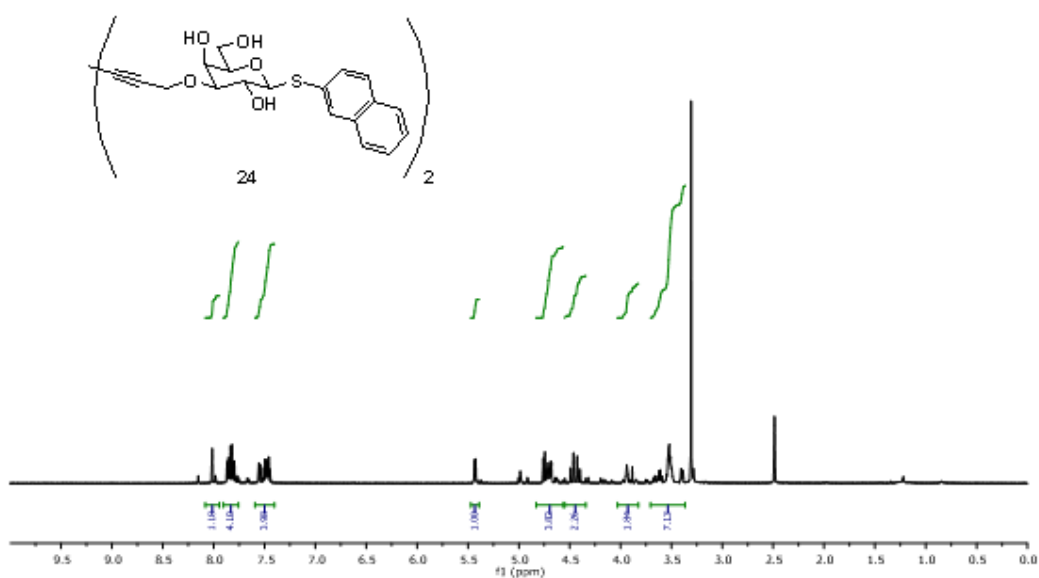

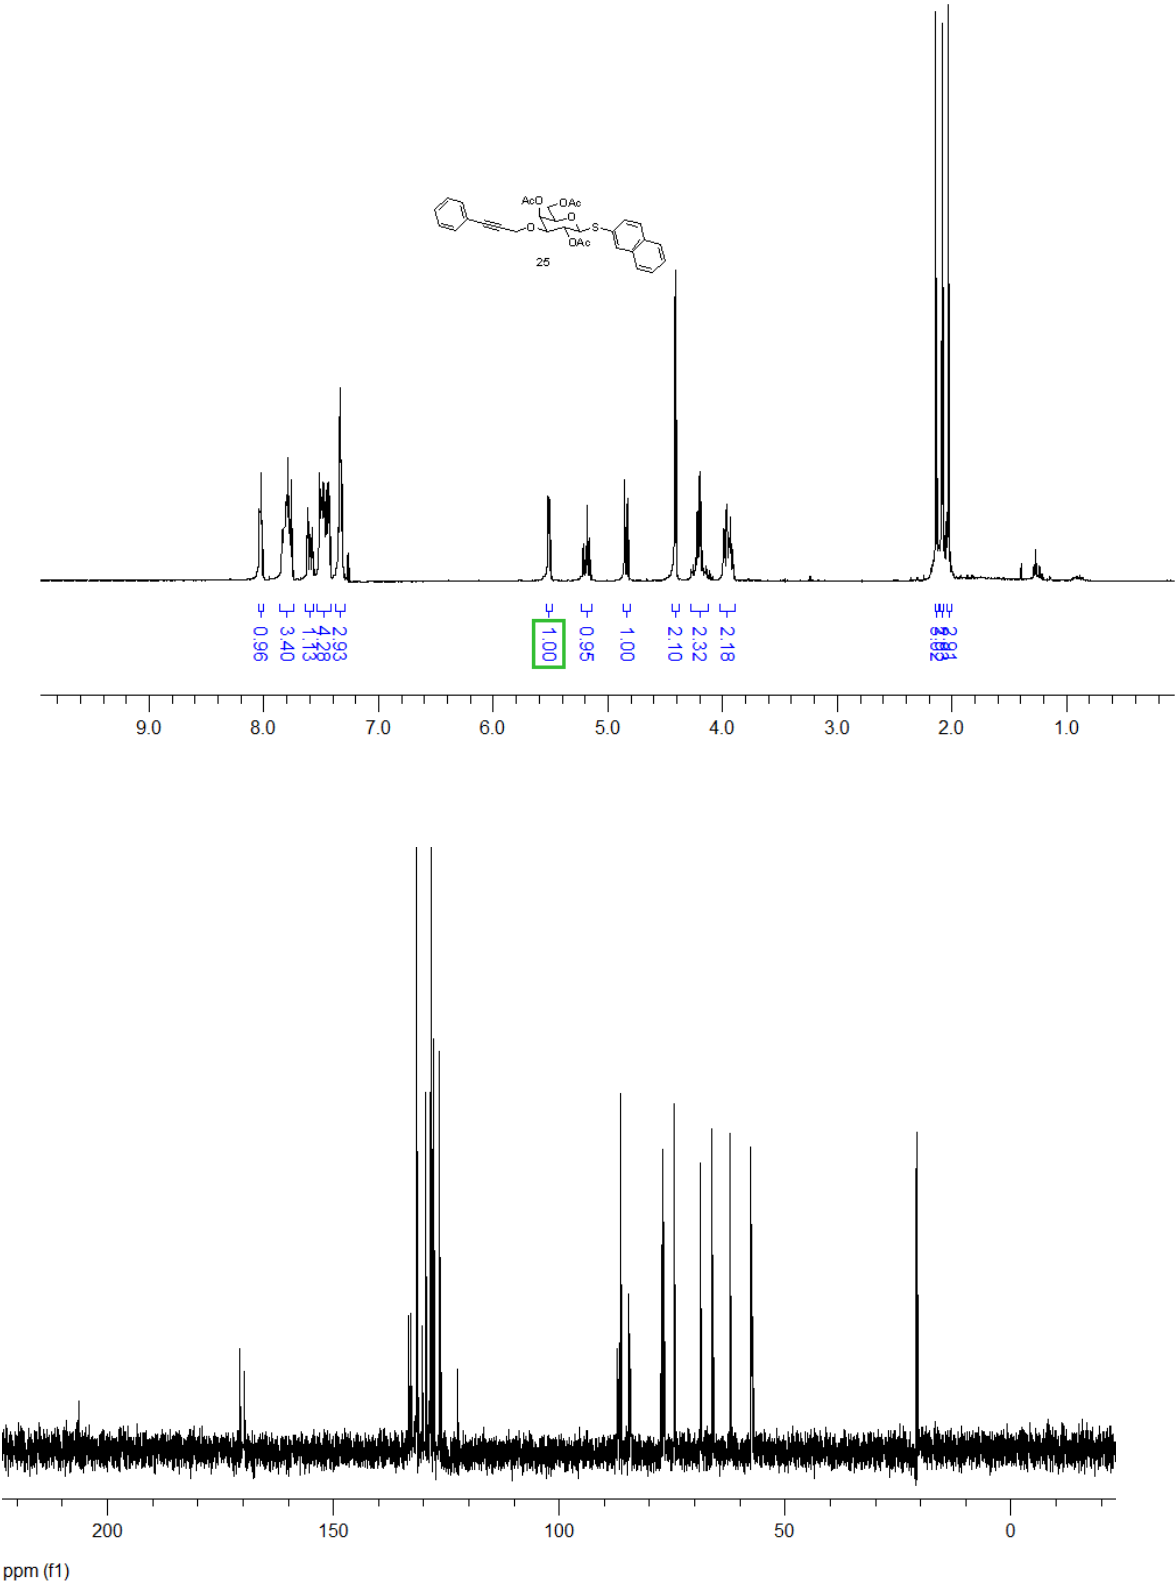

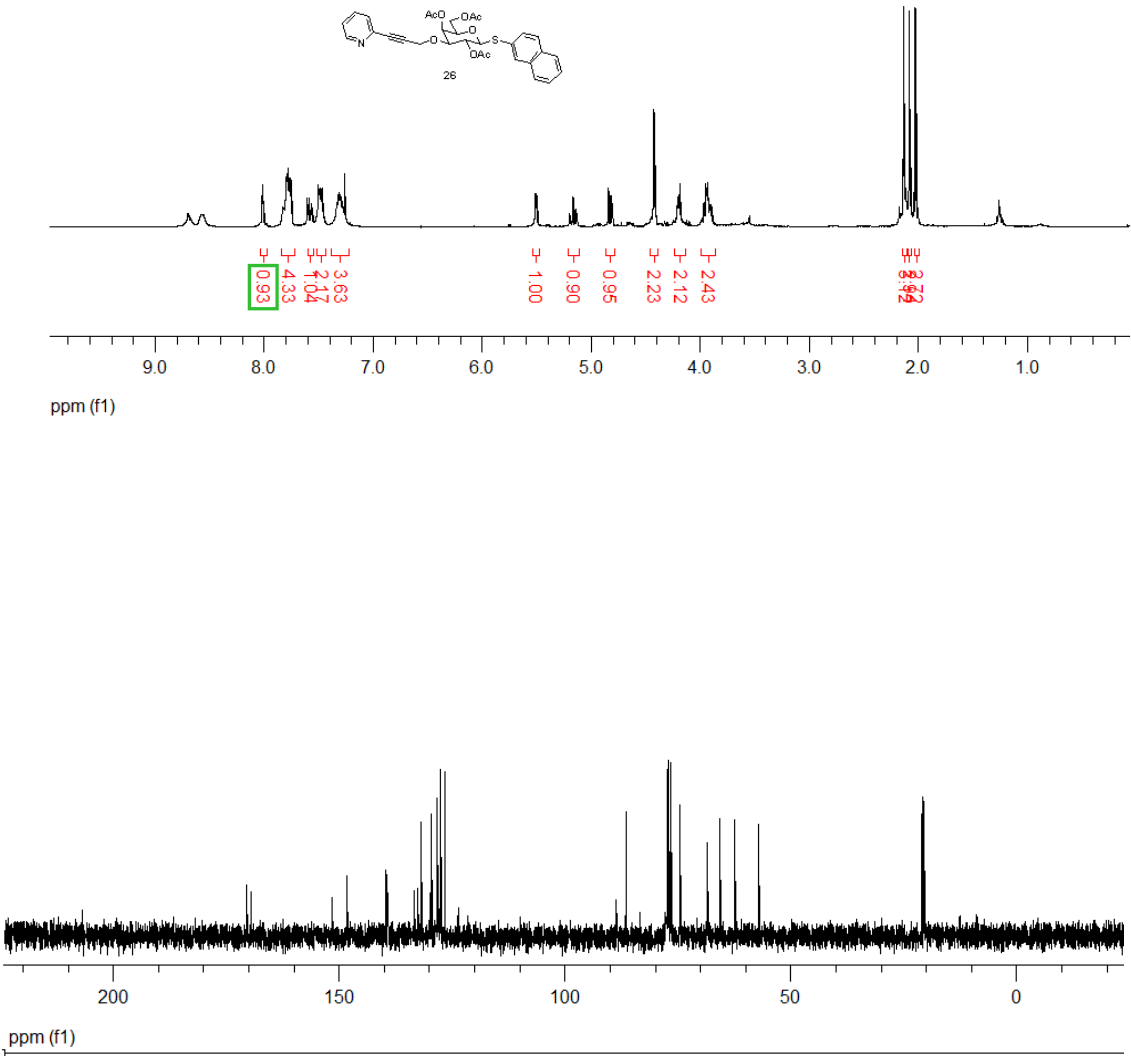

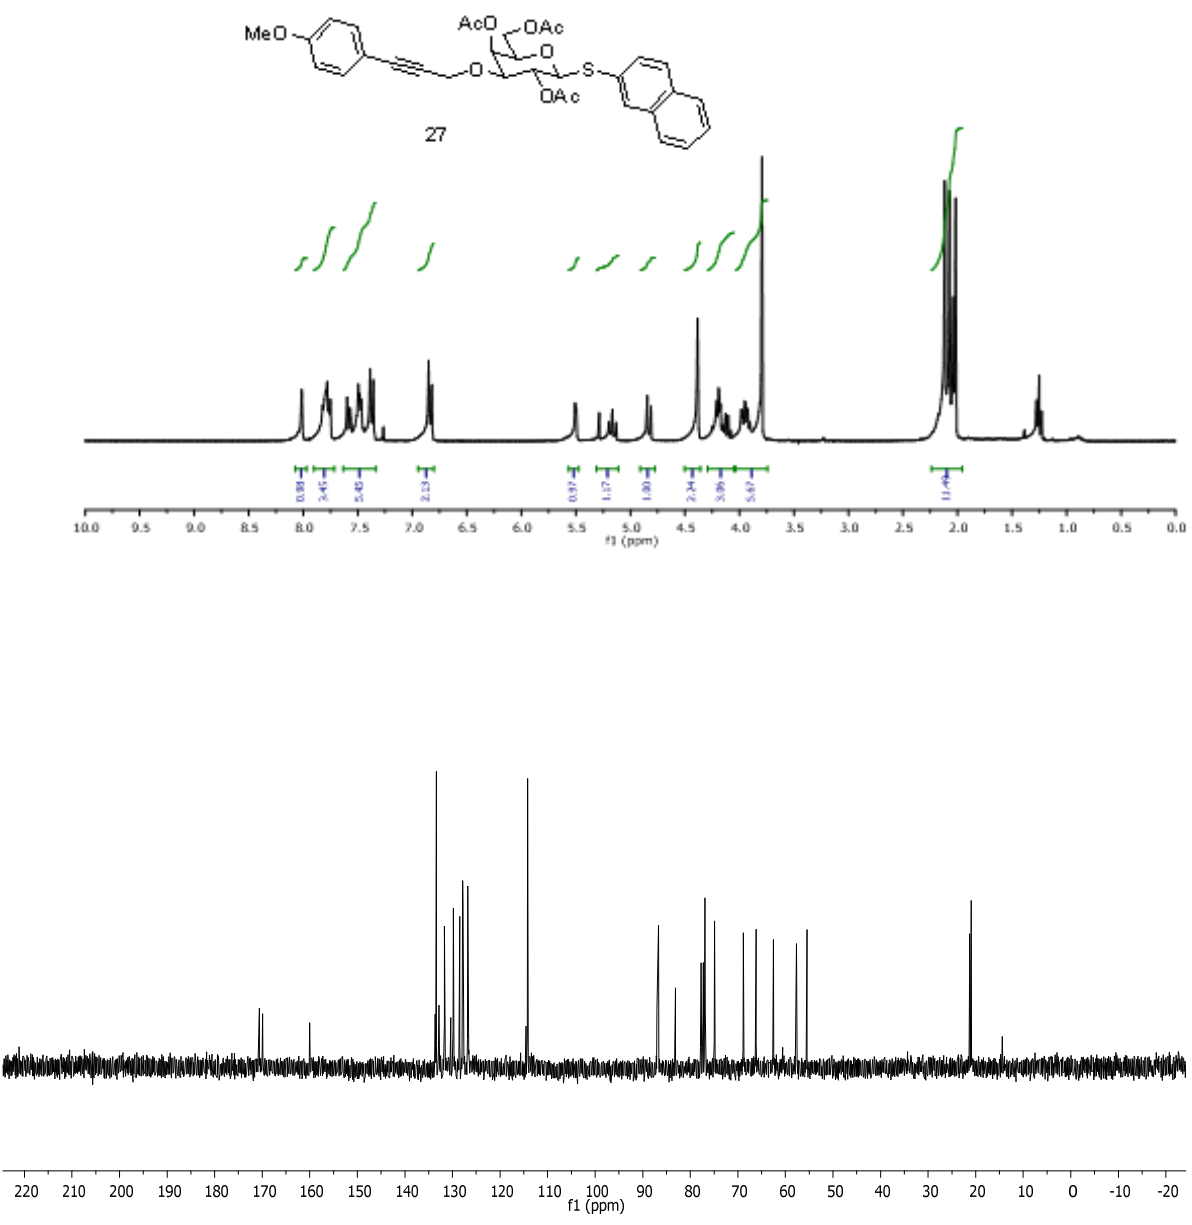

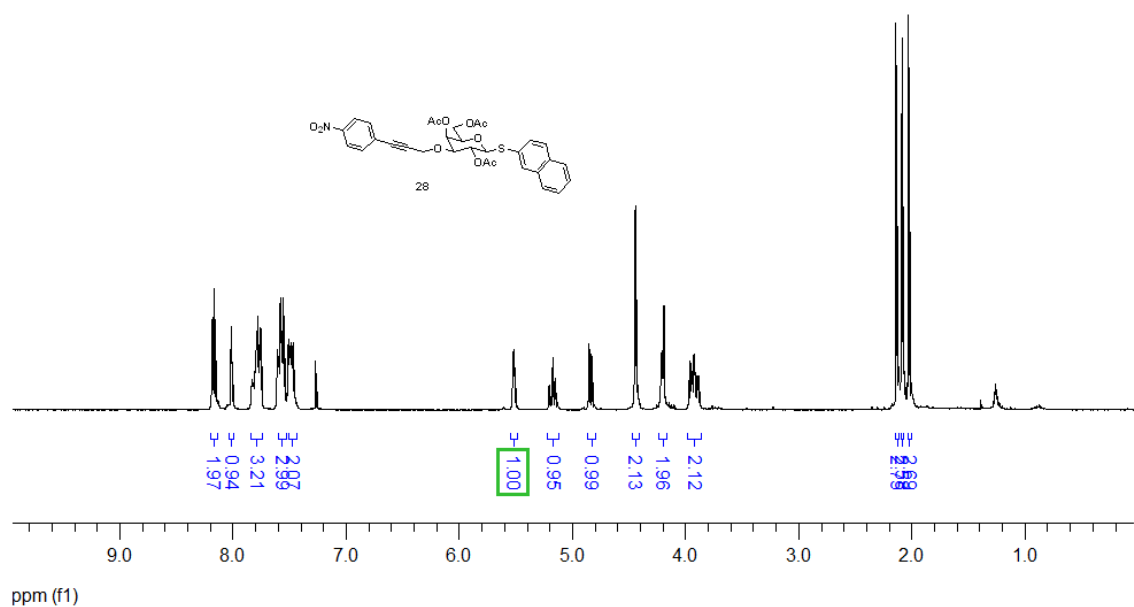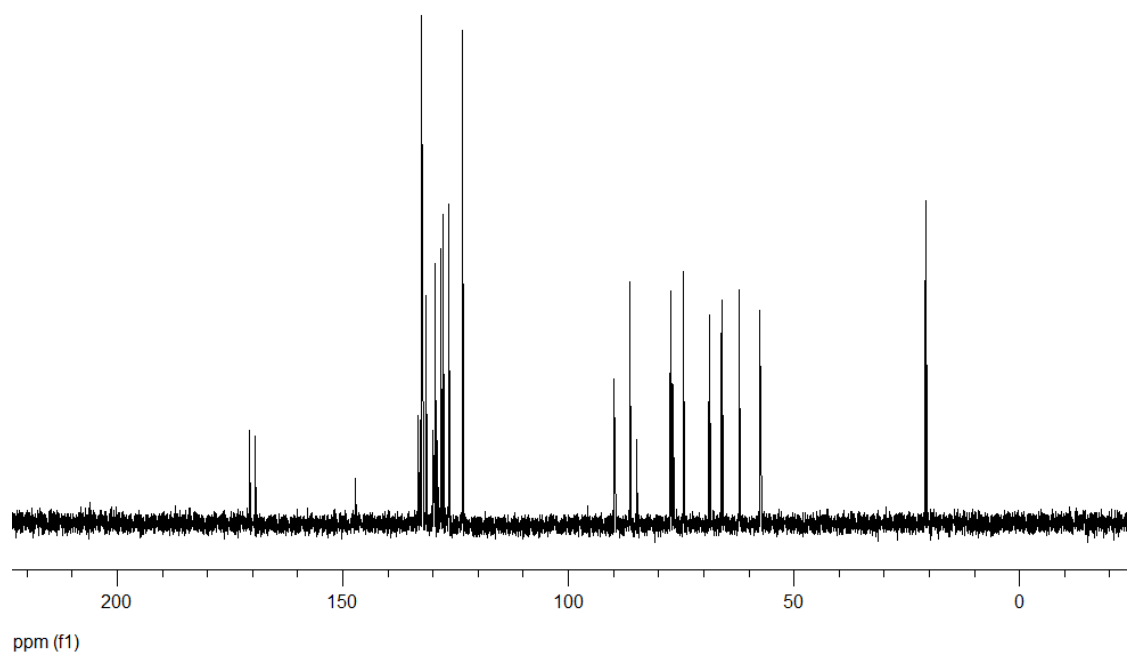

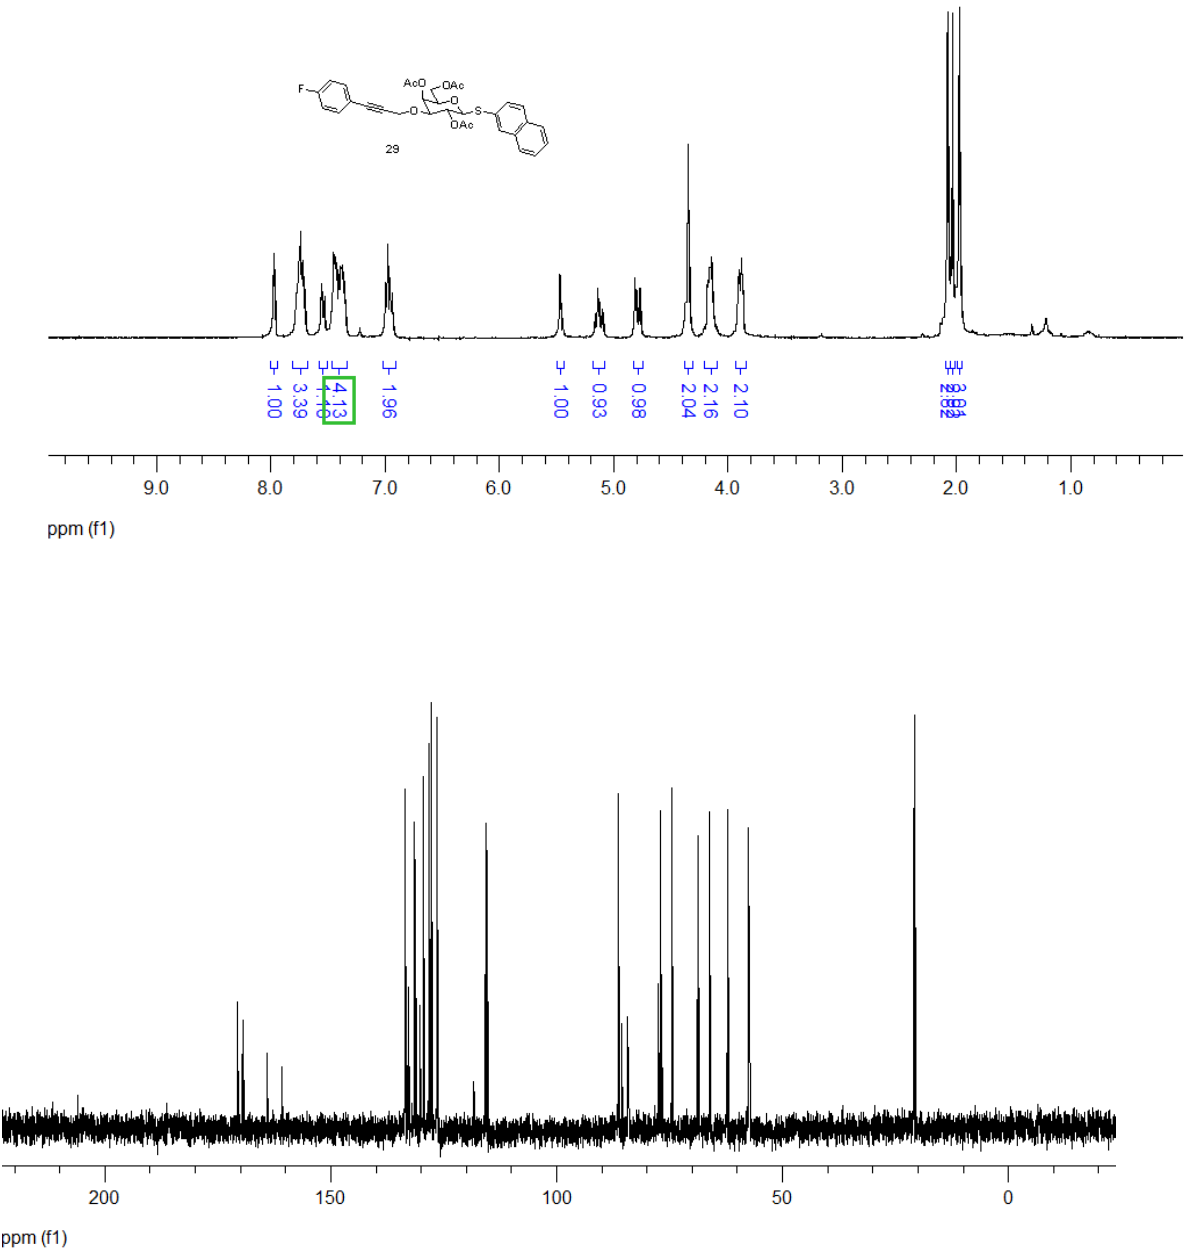

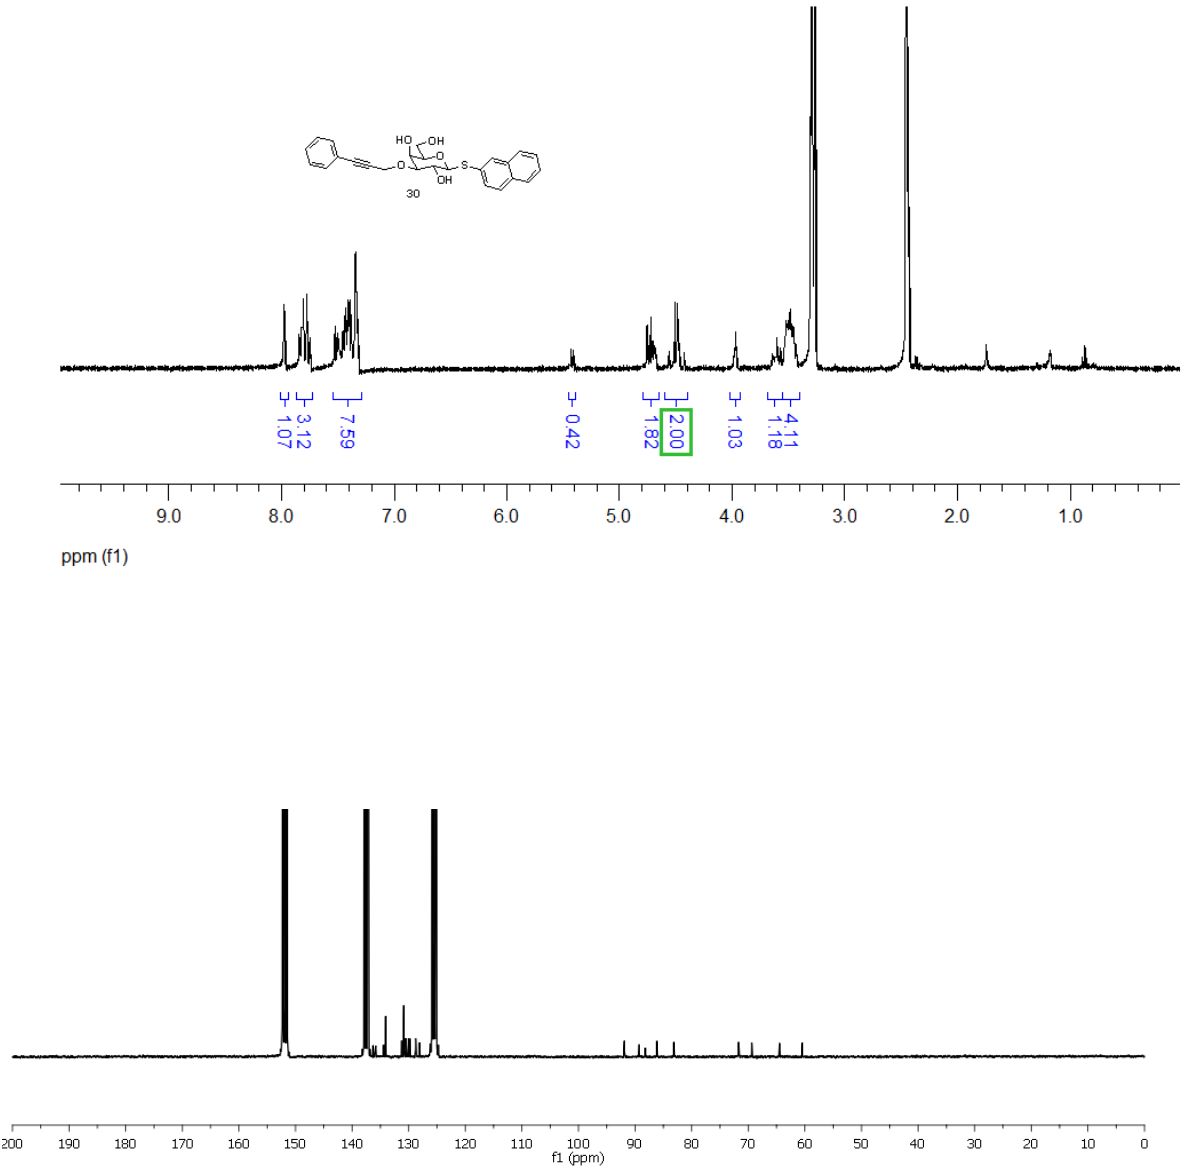



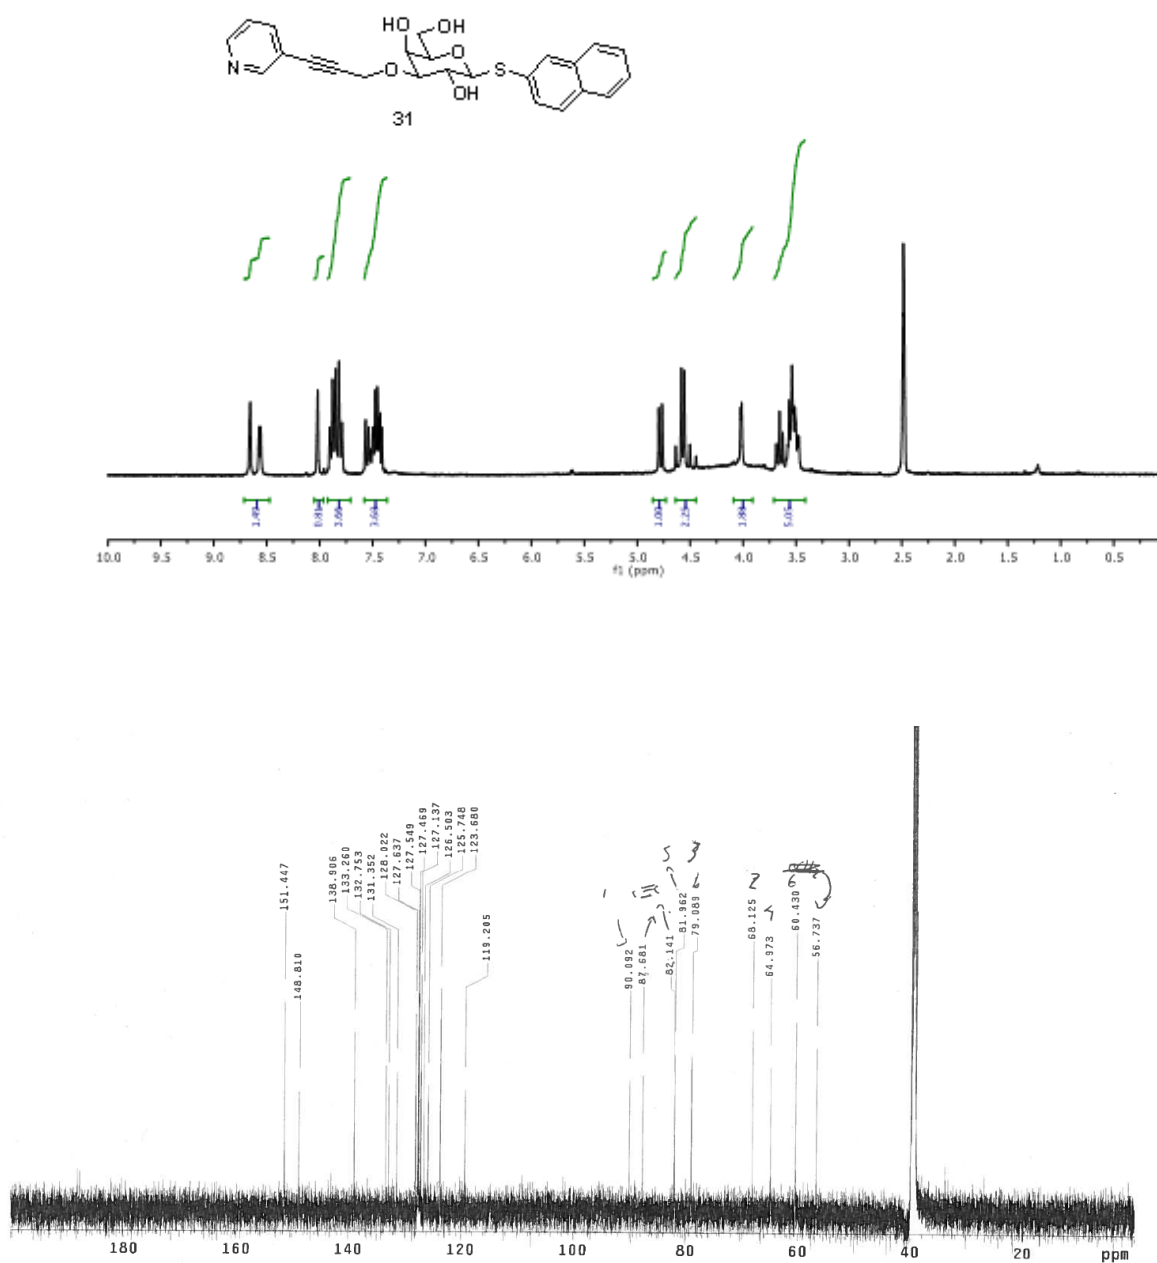

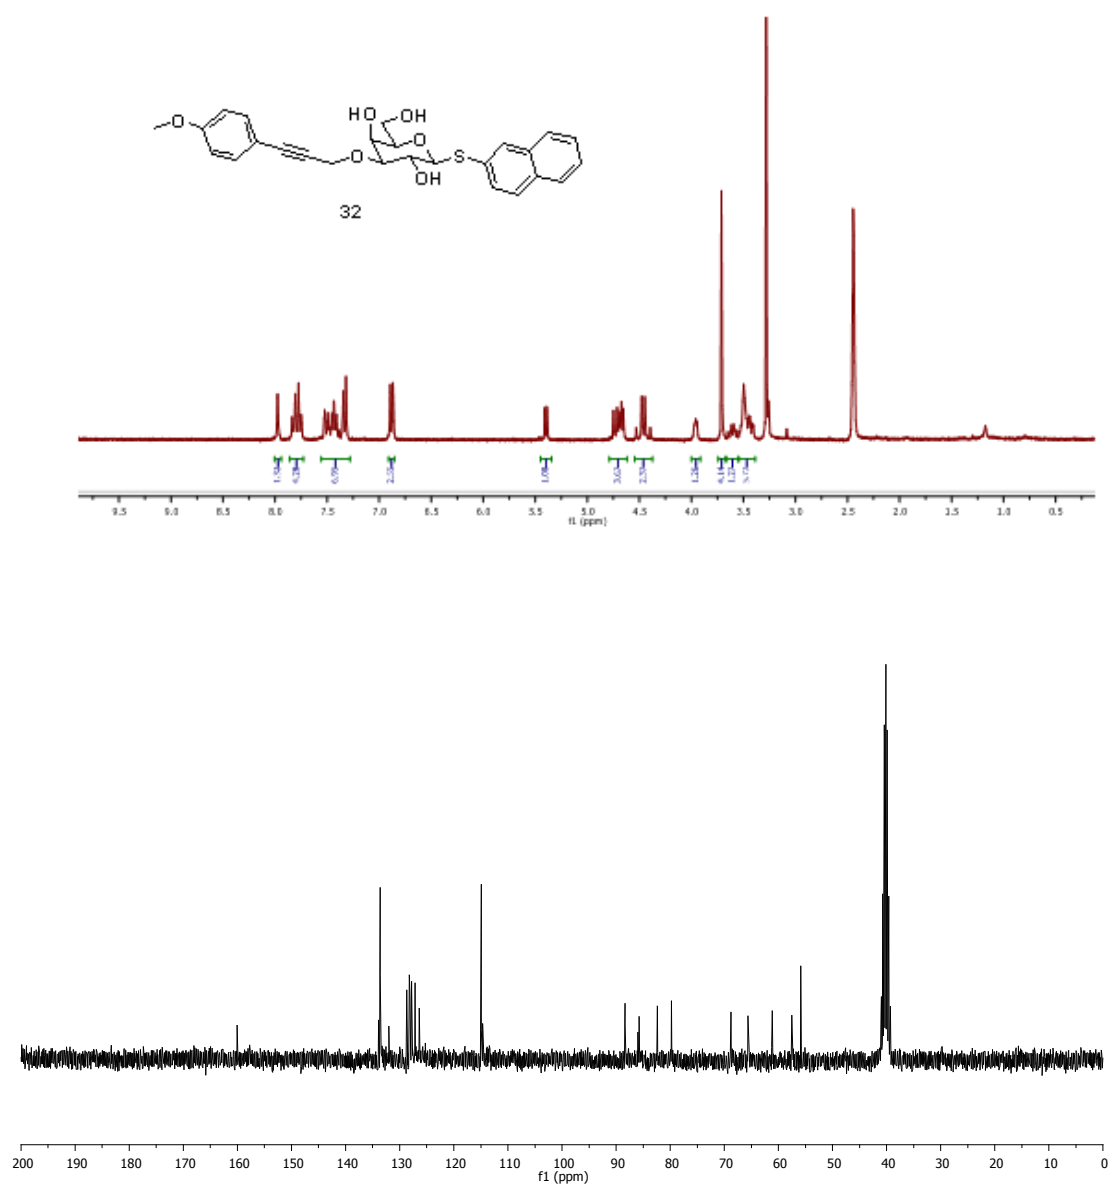

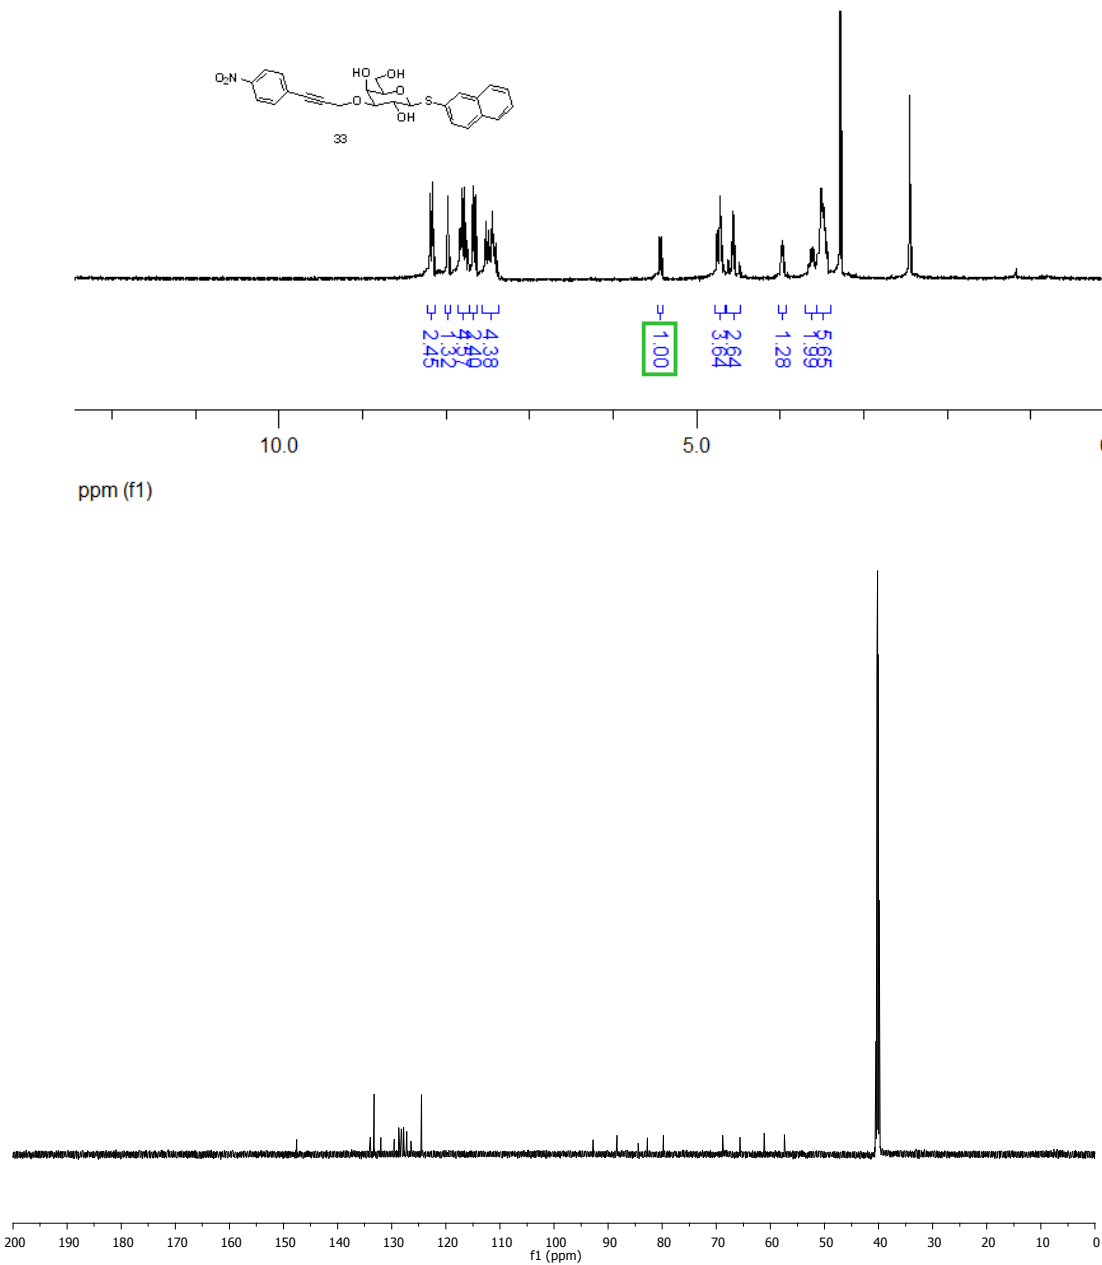

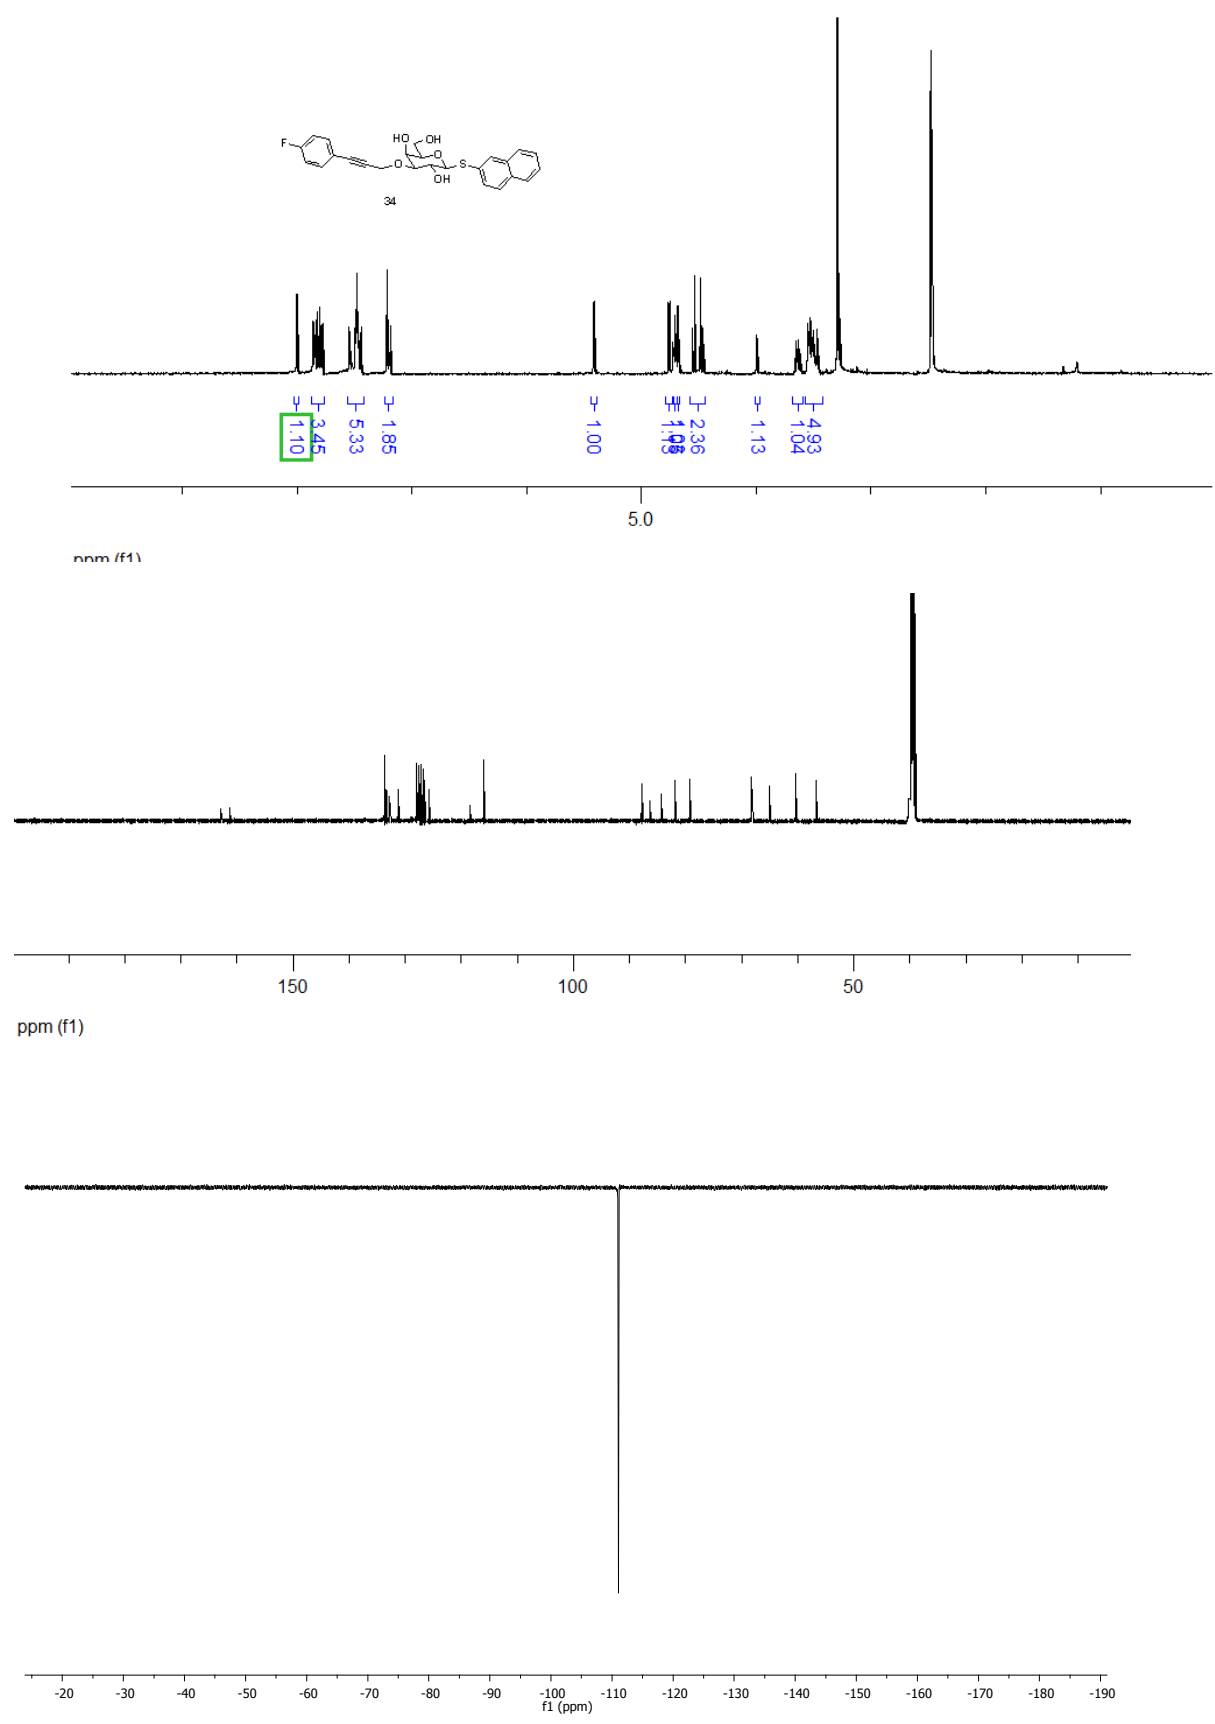

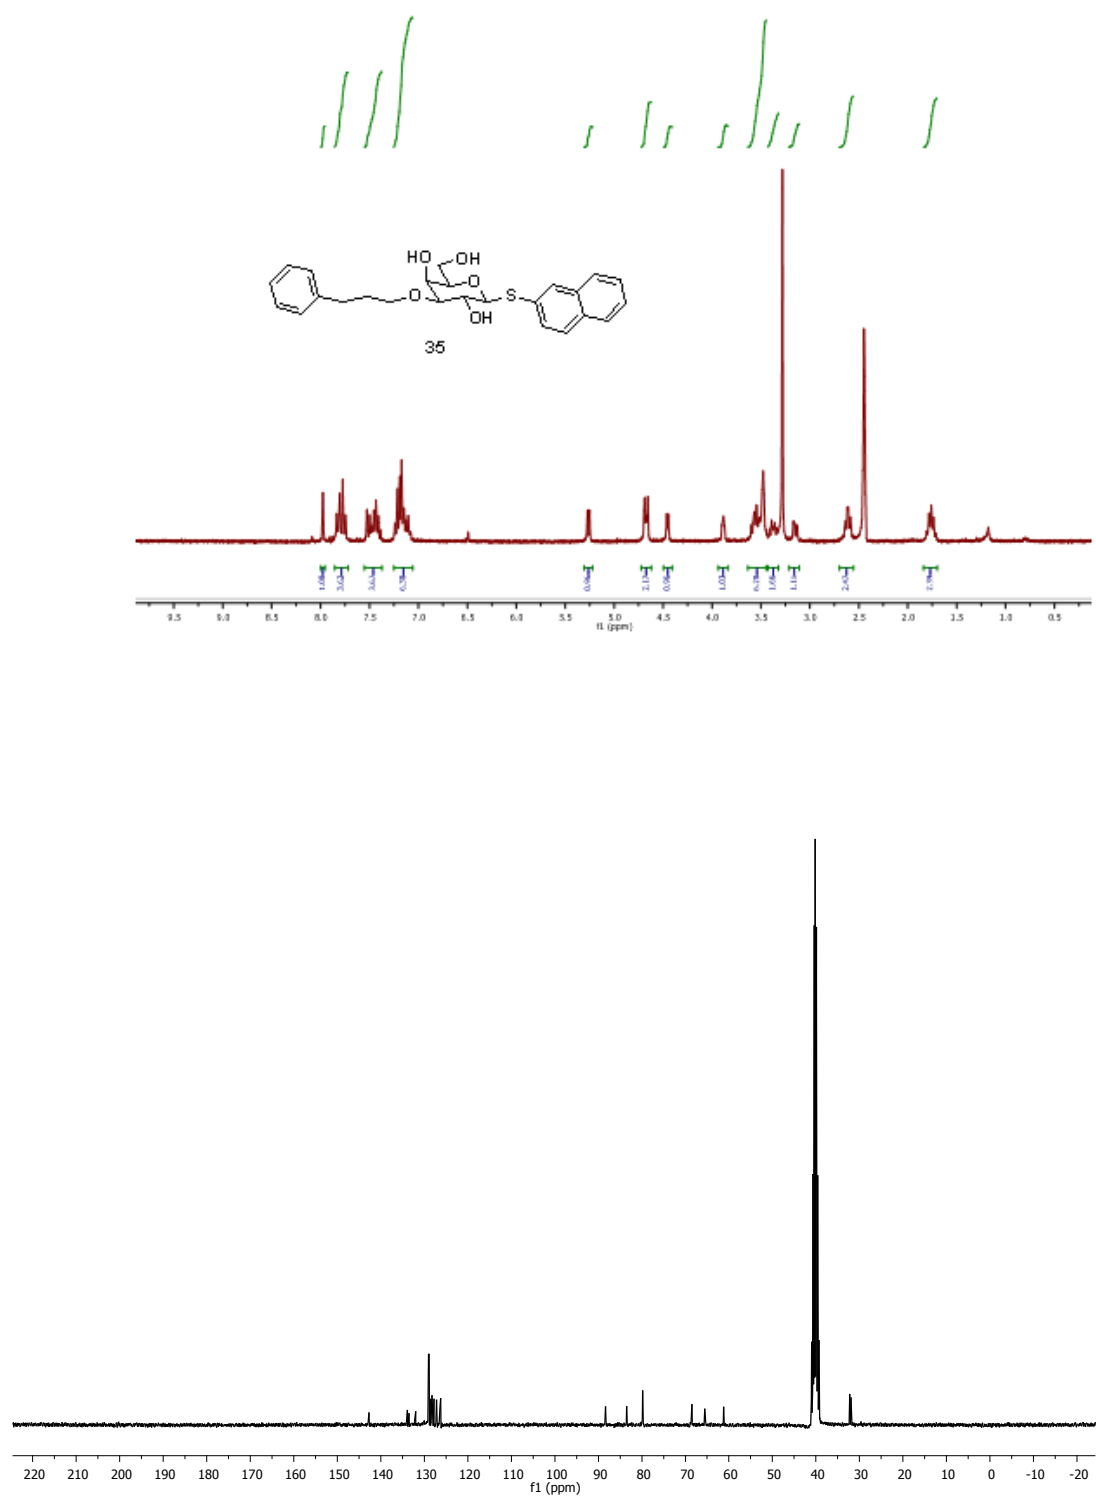

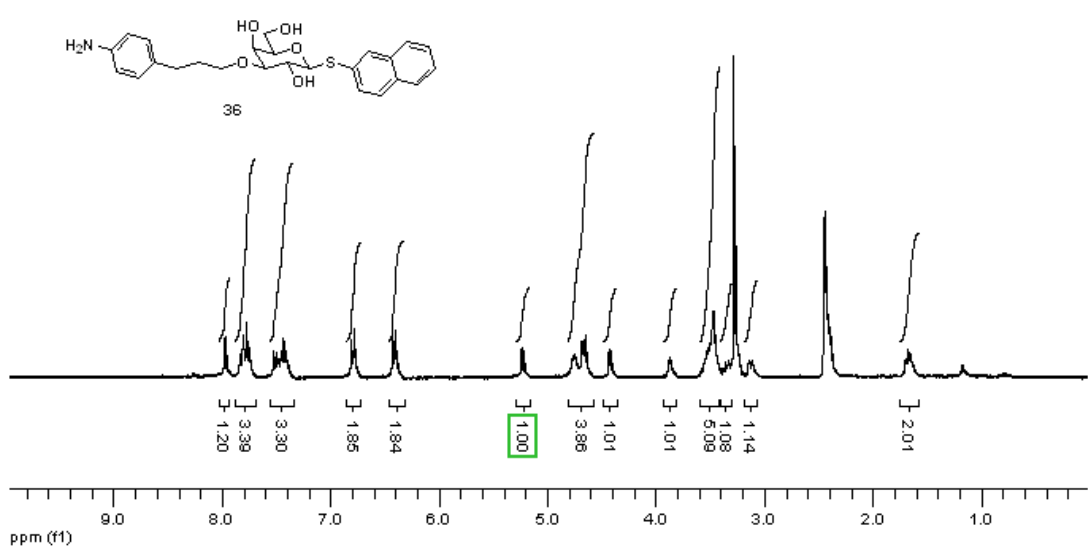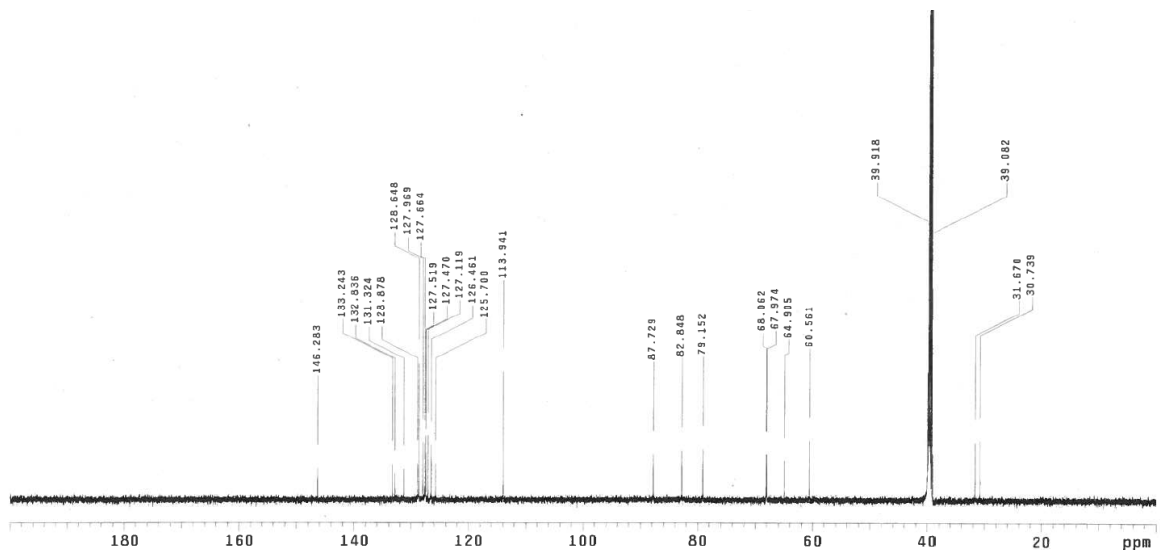

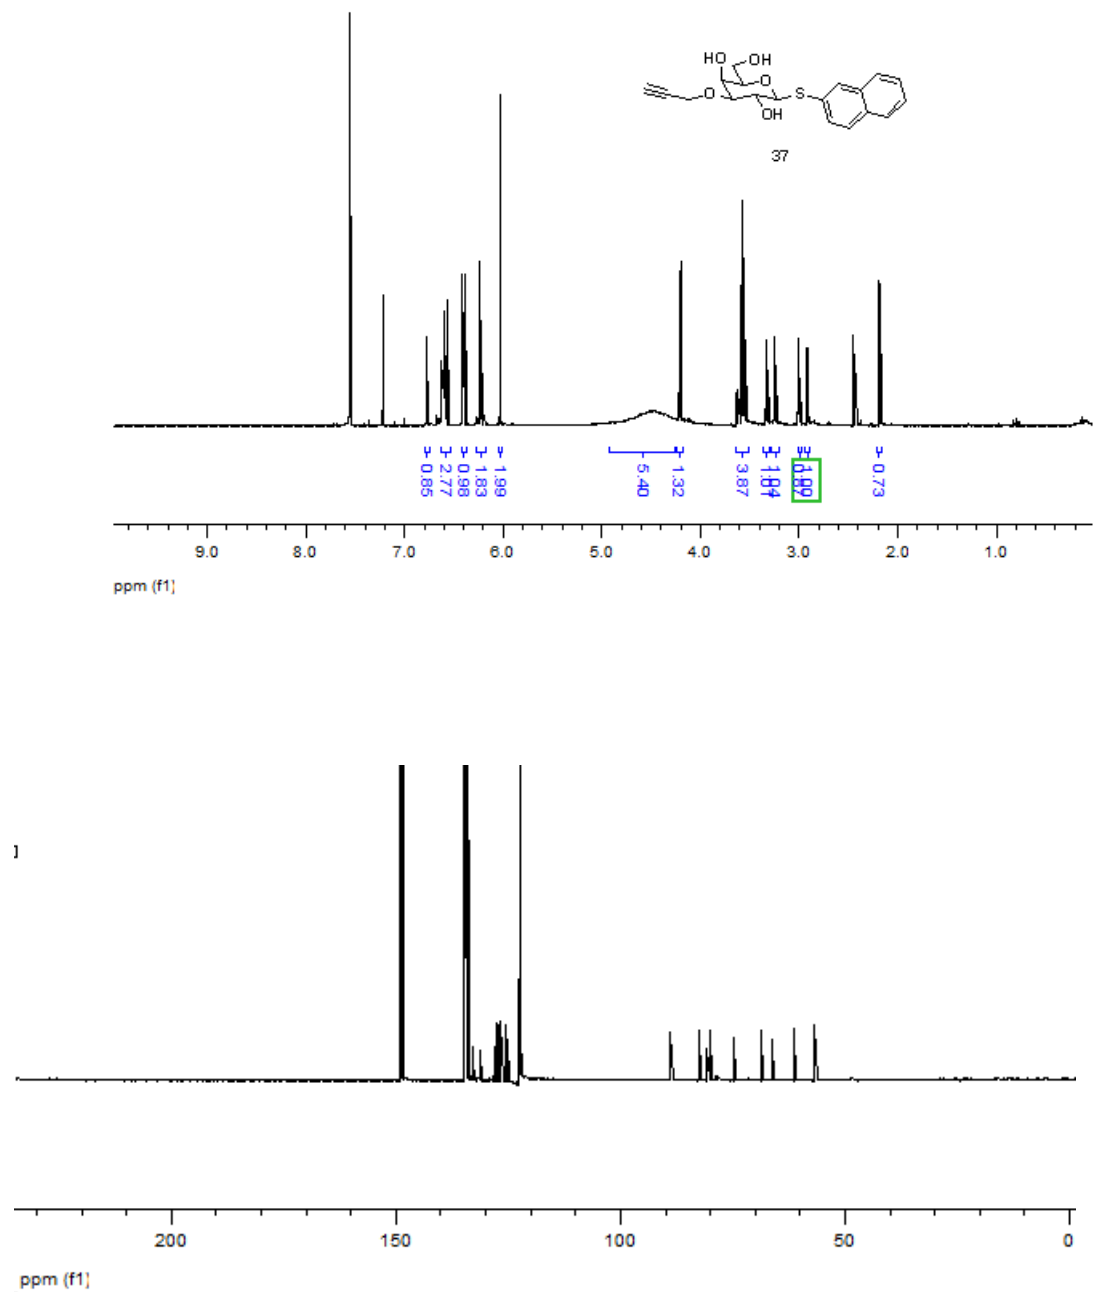

Supplement: c3ob41422a.pdf [file c3ob41422a.pdf]
